## Native KCC2 interactome reveals PACSIN1 as a critical regulator of synaptic inhibition

Vivek Mahadevan<sup>1,2</sup>, C. Sahara Khademullah<sup>1,#</sup>, Zahra Dargaei<sup>1,#</sup>, Jonah Chevrier<sup>1</sup>, Pavel Uvarov<sup>3</sup>, Julian Kwan<sup>4</sup>, Richard D. Bagshaw<sup>5</sup>, Tony Pawson<sup>5,§</sup>, Andrew Emili<sup>4</sup>, Yves DeKoninck<sup>6</sup>, Victor Anggono<sup>7</sup>, Matti S. Airaksinen<sup>3</sup>, Melanie A. Woodin<sup>1\*</sup>

<sup>1</sup> Department of Cell and Systems Biology, University of Toronto, 25 Harbord Street, Toronto, Ontario, M5S 3G5, Canada

<sup>2</sup> Present address: Section on Cellular and Synaptic Physiology, NICHD, Bethesda, Maryland, USA

<sup>3</sup> Department of Anatomy, Faculty of Medicine, University of Helsinki, Finland

<sup>4</sup> Department of Molecular Genetics, Donnelly Centre for Cellular and Biomolecular Research, University of Toronto, Toronto, Ontario, M5S 3E1, Canada

<sup>5</sup> Lunenfeld-Tanenbaum Research Institute, Mount Sinai Hospital, Toronto, ON, M5G 1X5, Canada

<sup>6</sup> Institut Universitaire en Santé Mentale de Québec, Québec, QC G1J 2G3, Canada; Department of Psychiatry and Neuroscience, Université Laval, Québec, QC, G1V 0A6, Canada

<sup>7</sup> Queensland Brain Institute, Clem Jones Centre for Ageing Dementia Research, The University of Queensland, Brisbane, QLD 4072, Australia

# Equal contribution

§ Deceased August 7, 2013

\* Corresponding author: [m.woodin@utoronto.ca](mailto:m.woodin@utoronto.ca), 416-978-8646

## 1 **Abstract**

2 KCC2 is a neuron-specific  $K^+$ - $Cl^-$  cotransporter essential for establishing the  $Cl^-$  gradient required for  
3 hyperpolarizing inhibition. KCC2 is highly localized to excitatory synapses where it regulates spine  
4 morphogenesis and AMPA receptor confinement. Aberrant KCC2 function contributes to numerous human  
5 neurological disorders including epilepsy and neuropathic pain. Using unbiased functional proteomics, we  
6 identified the KCC2-interactome in the mouse brain to determine KCC2-protein interactions that regulate  
7 KCC2 function. Our analysis revealed that KCC2 interacts with a diverse set of proteins, and its most  
8 predominant interactors play important roles in postsynaptic receptor recycling. The most abundant KCC2  
9 interactor is a neuronal endocytic regulatory protein termed PACSIN1 (SYNDAPIN1). We verified the  
10 PACSIN1-KCC2 interaction biochemically and demonstrated that shRNA knockdown of PACSIN1 in  
11 hippocampal neurons significantly increases KCC2 expression and hyperpolarizes the reversal potential  
12 for  $Cl^-$ . Overall, our global native-KCC2 interactome and subsequent characterization revealed PACSIN1  
13 as a novel and potent negative regulator of KCC2.

14

## 15 **Introduction**

16 GABA and glycine are the key inhibitory neurotransmitters of the mature nervous system, and most synaptic  
17 inhibition is mediated by  $Cl^-$  permeable  $GABA_A$  and glycine receptors. This hyperpolarizing inhibition results  
18 from the inward gradient for  $Cl^-$  established primarily by the  $K^+$ - $Cl^-$  cotransporter KCC2, which exports  $Cl^-$   
19 to maintain low intracellular  $Cl^-$  (Rivera et al., 1999; Doyon et al., 2016). KCC2 is a member of the *SLC12A*  
20 family of cation-chloride cotransporters and is unique among the members because it is present exclusively  
21 in neurons, and mediates the electroneutral outward cotransport of  $K^+$  and  $Cl^-$ .

22 During embryonic development KCC2 expression is low and GABA and glycine act as excitatory  
23 neurotransmitters, however during early postnatal development KCC2 expression is dramatically  
24 upregulated and GABA and glycine become inhibitory (Ben-Ari, 2002; Blaesse et al., 2009). Excitation-  
25 inhibition imbalance underlies numerous neurological disorders (Kahle et al., 2008; Nelson and Valakh,  
26 2015), and in many of these disorders, the decrease in inhibition results from a reduction in KCC2  
27 expression. In particular, KCC2 dysfunction contributes to the onset of seizures (Huberfeld et al., 2007;  
28 Kahle et al., 2014; Puskarjov et al., 2014; Stödberg et al., 2015; Saitsu et al., 2016), neuropathic pain (Coull

29 et al., 2003), schizophrenia (Tao et al., 2012), and autism spectrum disorders (ASD) (Cellot and Cherubini,  
30 2014; Tang et al., 2015; Banerjee et al., 2016). Despite the critical importance of this transporter in  
31 maintaining inhibition and proper brain function, our understanding of KCC2 regulation is rudimentary.

32 In addition to its canonical role of Cl<sup>-</sup> extrusion that regulates synaptic inhibition, KCC2 has also emerged  
33 as a key regulator of excitatory synaptic transmission. KCC2 is highly localized in the vicinity of excitatory  
34 synapses (Gulyas et al., 2001; Chamma et al., 2013) and regulates both the development of dendritic spine  
35 morphology (Li et al., 2007; Chevy et al., 2015; Llano et al., 2015) and function of AMPA-mediated  
36 glutamatergic synapses (Gauvain et al., 2011; Chevy et al., 2015; Llano et al., 2015). Thus, a dysregulation  
37 of these non-canonical KCC2 functions at excitatory synapses may also contribute to the onset of  
38 neurological disorders associated with both KCC2 dysfunction and excitation-inhibition imbalances.

39 KCC2 is regulated by multiple posttranslational mechanisms including phosphoregulation by distinct  
40 kinases and phosphatases (Lee et al., 2007; Kahle et al., 2013; Medina et al., 2014), lipid rafts and  
41 oligomerization (Blaesse et al., 2006; Watanabe et al., 2009), and protease-dependent cleavage (Puskarjov  
42 et al., 2012). KCC2 expression and function is also regulated by protein interactions, including creatine  
43 kinase B (CKB) (Inoue et al., 2006), sodium/potassium ATPase subunit 2 (ATP1A2) (Ikeda et al., 2004),  
44 chloride cotransporter interacting protein 1 (CIP1) (Wenz et al., 2009), protein associated with Myc (PAM)  
45 (Garbarini and Delpire, 2008), 4.1N (Li et al., 2007), the glutamate receptor subunit GluK2, its auxiliary  
46 subunit Neto2 (Ivakine et al., 2013; Mahadevan et al., 2014), cofilin1 (CFL1) (Chevy et al., 2015; Llano et  
47 al., 2015) and RAB11 (Roussa et al., 2016). However, since KCC2 exists in a large multi-protein complex  
48 (MPC) (Mahadevan et al., 2015), it is likely that these previously identified interactions do not represent all  
49 of the components of native-KCC2 MPCs.

50 In the present study, we performed unbiased multi-epitope tagged affinity purifications (ME-AP) of  
51 native-KCC2 coupled with high-resolution mass spectrometry (MS) from whole-brain membrane fractions  
52 prepared from developing and mature mouse brain. We found that native KCC2 exists in macromolecular  
53 complexes comprised of interacting partners from diverse classes of transmembrane and soluble proteins.  
54 Subsequent network analysis revealed numerous previously unknown native-KCC2 protein interactors  
55 related to receptor recycling and vesicular endocytosis functions. We characterized the highest-confidence

56 KCC2 partner identified in this screen, PACSIN1, and determined that PACSIN1 is a novel and potent  
57 negative regulator of KCC2 function.

58

## 59 RESULTS

### 60 Determining Affinity Purification (AP) conditions to extract native-KCC2

61 In order to determine the composition of native KCC2 MPCs using AP-MS, we first determined the  
62 detergent-based conditions that preserve native KCC2 following membrane extraction. In a non-denaturing  
63 Blue-Native PAGE (BN-PAGE), native-KCC2 migrated between 400 kDa – 1000 kDa in the presence of  
64 the native detergents C<sub>12</sub>E<sub>9</sub>, CHAPS, and DDM. However, all other detergent compositions previously used  
65 for KCC2 solubilization resulted in KCC2 migration at lower molecular weights (**Figure 1a**). This indicates  
66 that native detergent extractions are efficient at preserving higher-order KCC2 MPCs. Upon further analysis  
67 using standard SDS-PAGE we observed that the total KCC2 extracted was greater in C<sub>12</sub>E<sub>9</sub> and CHAPS-  
68 based detergent extractions in comparison with all other detergents (**Figure 1a, Figure 1 – Figure**  
69 **Supplement 1, 2**), hence we restricted our further analysis to C<sub>12</sub>E<sub>9</sub> and CHAPS-based membrane  
70 preparations.

71 To determine which of these two detergents was optimal for our subsequent full-scale proteomic  
72 analysis, we performed AP-MS to compare the efficacy of C<sub>12</sub>E<sub>9</sub> versus CHAPS-solubilized membrane  
73 fractions. Immunopurification was performed on membrane fractions prepared from adult (P50) wild-type  
74 (WT) mouse brain, using a well-validated commercially available C-terminal KCC2 antibody (Williams et  
75 al., 1999; Gulyas et al., 2001; Woo et al., 2002; Mahadevan et al., 2014) and a control IgG antibody. In both  
76 detergent conditions, we recovered maximum peptides corresponding to KCC2 from the KCC2 pull downs  
77 (KCC2-AP), in comparison to the control IgG pull downs (IgG-AP), confirming the specificity of the C-  
78 terminal KCC2 antibody (**Figure 1b** and **Figure 1 – Source Data 1**). However, upon further examination,  
79 two key pieces of evidence indicated that C<sub>12</sub>E<sub>9</sub> -based conditions are optimal for proteomic analysis of  
80 native KCC2. First, we observed peptides corresponding to both KCC2 isoforms-a and -b; in C<sub>12</sub>E<sub>9</sub>-based  
81 samples, but we could only detect peptides corresponding to KCC2 isoform-a in KCC2-APs from CHAPS-  
82 based samples. Second, we observed a higher enrichment of peptides corresponding to previously  
83 identified KCC2 interactors belonging to the family of Na<sup>+</sup>/K<sup>+</sup> ATPases (ATP1A1-3), and the family of

84 creatine kinases (CKB, CKMT1), and CFL1 in the KCC2-AP from C<sub>12</sub>E<sub>9</sub>-based samples. Based on these  
85 results we concluded that C<sub>12</sub>E<sub>9</sub>-based solubilization conditions yield more KCC2-specific binding partners  
86 and fewer IgG-specific binding partners compared to CHAPS, and thus provide a higher stringency for  
87 KCC2 AP-MS. Thus we performed all subsequent proteomic analysis of native KCC2 on samples  
88 solubilized with C<sub>12</sub>E<sub>9</sub>.

89

90

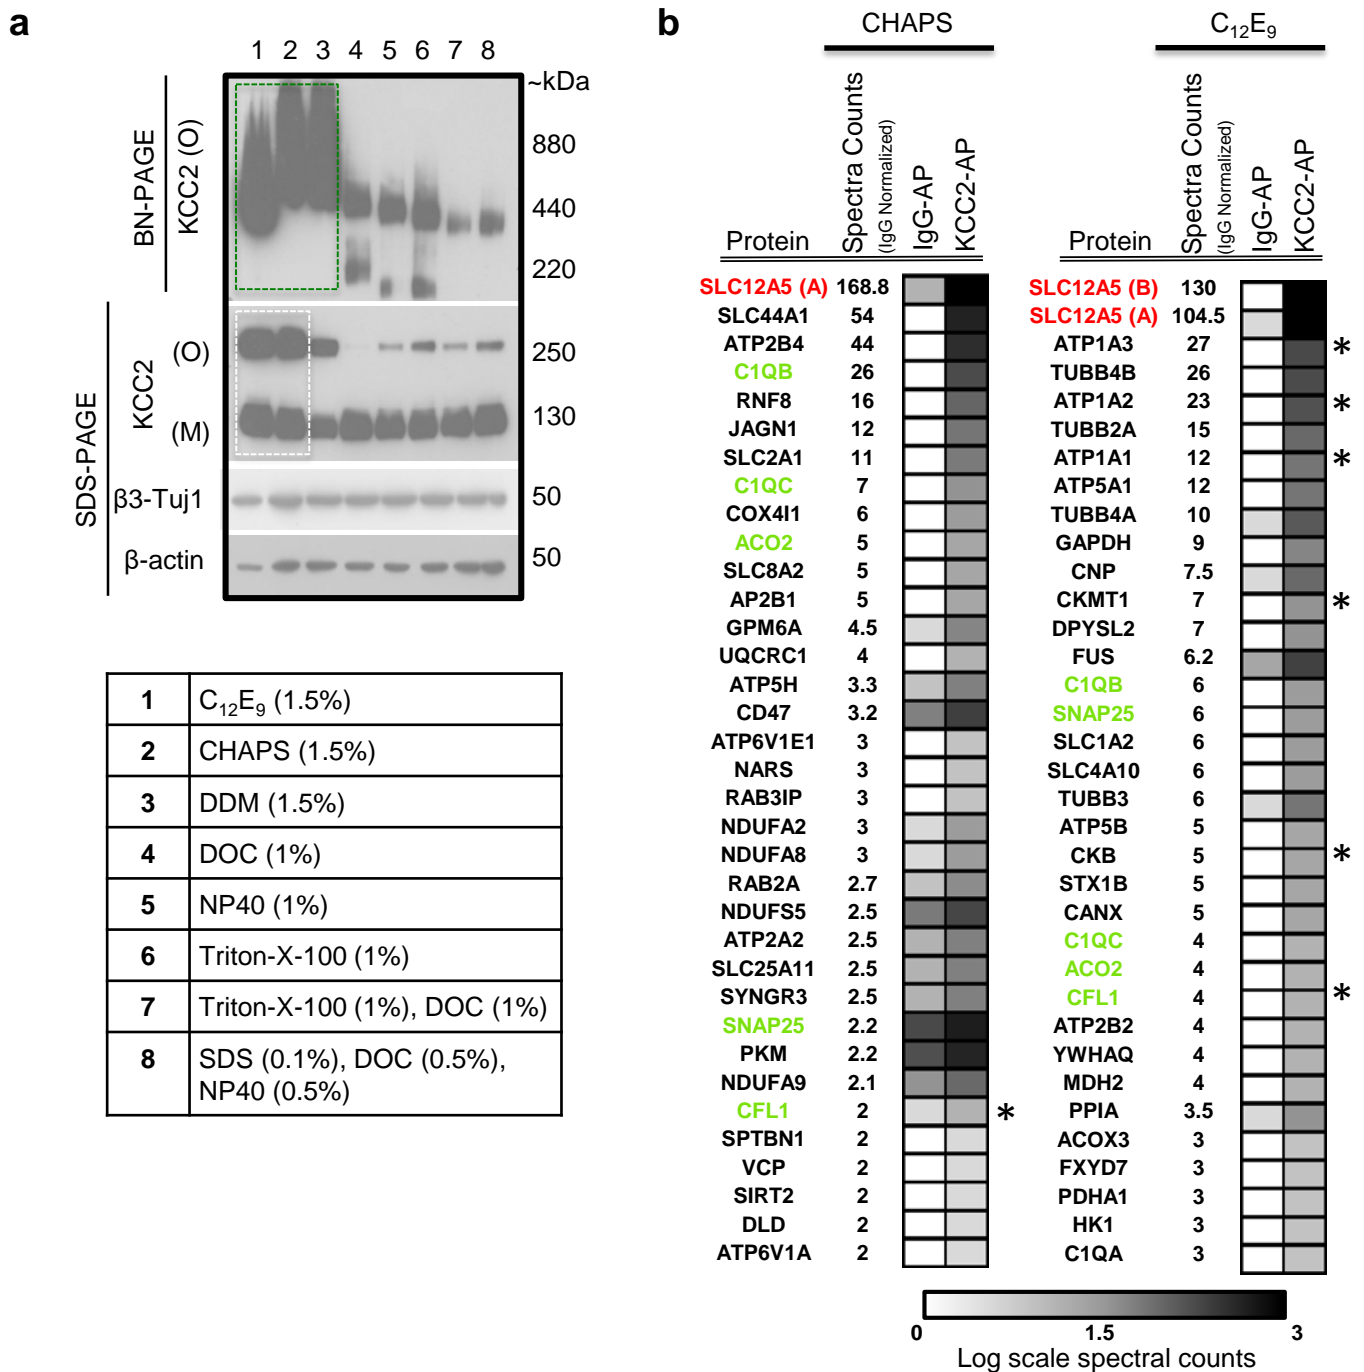

**Figure 1.** KCC2 multi-protein complexes can be extracted using native detergents. **(a)** BN-PAGE and SDS-PAGE separation of solubilized membrane fractions prepared from ~P50 mouse brain, using the detergents listed in the associated table. Protein separations were Western-blotted and probed with antibodies indicated on the left. O, oligomer; M, monomer. Blots are representative of two independent biological replicates. **(b)** Comparison of the top 35 proteins identified with high confidence in C-terminal KCC2 antibody immunoprecipitations from CHAPS-based or C<sub>12</sub>E<sub>9</sub>-based membrane extractions. IgG-AP immunoprecipitations were performed as a control. Heat maps represent log scale spectral counts of individual proteins per condition, expressed relative to global spectral counts. Unique peptides corresponding to KCC2 (indicated in red font) were most abundant in both conditions, confirming the specificity of the C-terminal antibody. Previously identified KCC2 interacting partners are identified by asterisks. Proteins in green represent those that commonly co-precipitated with KCC2 regardless of the detergent extraction.

The following source data and figure supplements are available for Figure1:

Figure 1 – Figure Supplement 1: Workflow to enrich KCC2 complexes

Figure 1 – Figure Supplement 2: SDS-PAGE separation of solubilized membrane fractions

Figure 1 – Source Data 1: Proteins enriched in KCC2-AP using CHAPS vs C12E9

91 **Multi-epitope (ME) proteomic analysis of KCC2 complexes in the developing and mature brain**

92 KCC2b is the most abundant isoform in the mature brain(Uvarov et al., 2009; Markkanen et al., 2014), and  
93 the isoform largely responsible for the extrusion of intracellular Cl<sup>-</sup>, and thus the shift from excitatory to  
94 inhibitory GABA during early postnatal development (Kaila et al., 2014). To focus our proteomic analysis  
95 on KCC2b we used a multi-epitope approach that allowed us to distinguish the KCC2 isoforms (**Figure 2a**).  
96 The C-terminal antibody recognizes both isoforms (Uvarov et al., 2007, 2009; Markkanen et al., 2014), so  
97 we chose to use another antibody that is specifically raised against the unique N-terminal tail of the KCC2b  
98 isoform. Lastly, we used a phosphospecific antibody for serine 940 (pS940), as phosphorylation of this  
99 residue increases KCC2 surface expression and/or transporter function (Lee et al., 2007, 2011). We  
100 validated these three KCC2 antibodies (C-terminal, N-terminal, and pS940) for KCC2-immunoenrichment  
101 (**Figure 2 – Figure Supplement 1**). Moreover, by taking a multi-epitope approach we significantly  
102 increased the likelihood of detecting KCC2 interactions that may be missed during single-epitope AP  
103 approaches. We performed 25 rounds of AP-MS on both developing (P5) and mature/adult (P50) WT  
104 mouse brain (**Figure 2 – Source Data 1**). We could not use KCC2-knockout brains since these animals die  
105 at birth, so as an alternative we used a mock IP for each sample condition in the absence of the KCC2  
106 antibody using parallel preimmunization immunoglobulin (IgG/IgY) as negative controls. We obtained 440  
107 potential KCC2 protein interactors with 99% confidence and a 1% false discovery rate. We identified KCC2  
108 peptides spanning the entire sequence of KCC2 with ~44% sequence coverage, primarily at the C- and N-  
109 terminal tails (**Figure 2b**); and in both the developing and mature brain, KCC2 peptides were the most  
110 abundant peptides identified in the KCC2-IPs (**Figure 2c**). While the KCC2 C-terminal antibody recovered  
111 peptides from both isoforms of KCC2, the N-terminal KCC2b-specific antibody did not recover any KCC2a  
112 isoform-specific peptides, indicating the specificity of the antibodies used, and the success of KCC2-  
113 immunoenrichment in our AP-assays.

114

115

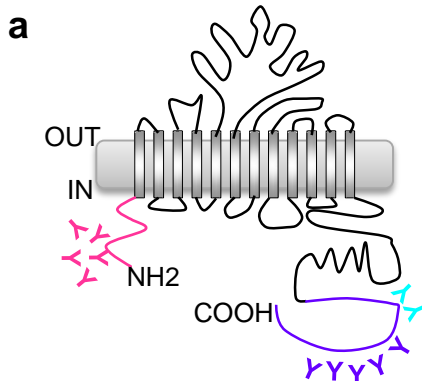

- Y N-terminal Ab KCC2b aa8-22
- Y C-terminal Ab KCC2a,b aa932-1043
- Y pS940 Ab KCC2a,b

**Figure 2.** Multi-epitope AP identifies native-KCC2 protein constituents in mouse brain. **(a)** Schematic of the locations of anti-KCC2 antibodies. **(b)** The primary KCC2 amino acid sequence. Red indicates the protein coverage of KCC2 identified by MS analysis; yellow indicates unique coverage for KCC2a and KCC2b isoforms. MS/MS-spectra of peptides unique for KCC2a and KCC2b. Right: the MS/MS ion fragmentation of the corresponding amino acid sequence is indicated above the spectra. **(c)** Spectral and peptide count plots of proteins in AP with all three anti-KCC2 antibodies in developing brain membrane fractions (P5, left) and adult brain membrane fractions (P50, right). Peptide and spectral counts are normalized (anti-KCC2/IgG) and plotted on a log scale. Red circles - highly enriched KCC2 bait. Blue circles - highly enriched PACSIN1 target peptides. Dark-grey circles - top proteins enriched with KCC2-AP in comparison to IgG control-AP. Light-grey circles - proteins enriched in IgG control-AP in comparison to KCC2-AP and known spurious interactors. The following source data and figure supplements are available for Figure 2:

Figure 2 - Figure Supplement 1. Validation of KCC2 antibodies used for immunodepletion.  
 Figure 2 - Source Data 1: MS Replicates.

**b** SLC12A5, Mouse  
 Possible Coverage 64.9%,  
 Identified Coverage 44.2%

|      |            |            |            |             |                    |
|------|------------|------------|------------|-------------|--------------------|
| 0001 | MSRRFTVTSL | PPAASAASAD | PESRRHVSAD | PRRLPREVDK  | - (KCC2a-specific) |
|      | MLNNLTDCED | GDGGANP    |            |             | - (KCC2b-specific) |
| 0041 | GDGNPKESSP |            |            |             |                    |
| 0051 | FINSTDTEKG | REYDGRNMAL | FEEEMDTSMP | VSSLLSGLAN  | YTNLPQGSRE         |
| 0101 | HEEAENNEGG | KKKPVQAPRM | GTFMGVYLPC | LQNIQGVILF  | LRLTWVVGIA         |
| 0151 | GIMESFCMVF | ICCSCTMLTA | ISMSAIATNG | VVPAGGSYYM  | ISRSLGPEFG         |
| 0201 | GAVGLCFYLG | TTFAGAMYIL | GTEIILLAYL | FPAMAIFKAE  | DASGEAAAML         |
| 0251 | NNMRVYGTGV | LTCMATVVFV | GVKYVKNFAL | VFLGCVILSI  | LAIYAGVIKS         |
| 0301 | AFDPPNFPIC | LLGNRTLRR  | GFDVCAKLAW | EGNETVTTRL  | WGLPCSSRL          |
| 0351 | NATCDEYFTR | NNVTEIQGIP | GAASGLIKEN | LWSSYLTQGV  | IVERRGMPSV         |
| 0401 | GLADGTFVDM | DHPYVFSDMT | SYFTLLVGIY | FPVSTGIMAG  | SNRSGDLRDA         |
| 0451 | QKSIPTGTIL | AIATTSAVYI | SSVVLFGACI | EGVVLRDKFG  | EAVNGNLVVG         |
| 0501 | TLAWPSPWVI | VIGSFFSTCG | AGLQSLTGAP | RLLOAISRDG  | YVPLQVFGH          |
| 0551 | GKANGEPTWA | LLLTACICEI | GILIASLDEV | APILSMFFLM  | CYMFVNLACA         |
| 0601 | VQTLRLTPNW | RPRFRYYHWT | LSFLGMSLCL | ALMPICSWY   | ALVAMLTAGL         |
| 0651 | IYKYIEYRGA | EKEWGDGIRG | LSLSAARYAL | LRLEEGPPHT  | KNWRPQLLVL         |
| 0701 | VRVDQDQNVV | HPQLLSLTSQ | LKAGKGLTIV | GSVLEGTFLD  | NHPQARAE           |
| 0751 | SIRRLMEAEK | VKGFCQVVIS | SNLRDGVSHL | IQSGGLGLQ   | HNTVLGVNPR         |
| 0801 | NWRQKEDHQT | WRNFIELVRE | TTAGHLALLV | TKNVSMFFCG  | PERFSEGSID         |
| 0851 | VWIVVHDGGM | LMLLPPLLRH | HKVWRKCKMR | IFTVAQMDDN  | SIQMKKDLTT         |
| 0901 | FLYHLRITAE | VEVVEMHESD | ISAYTYEKT  | VMEQRSQILK  | QMHLTKNERE         |
| 0951 | REIQSITDES | RGSIRRNKPA | NPRLRLNVPE | ETACDNEEK   | EEEVQLIHDQ         |
| 1001 | SAPSCPSSSP | SPGEEPEGER | ETDPEVHLTW | TKDKSVAEKN  | KGPSVPSSEG         |
| 1051 | IKDFFSMKPE | WENLNQSNVR | RMHTAVRLNE | VIVNKSRLDAK | LVLNMPGPP          |
| 1101 | RNRNGDENYM | EFLEVLTEQL | DRVMLVRGGG | REVITIYS    |                    |

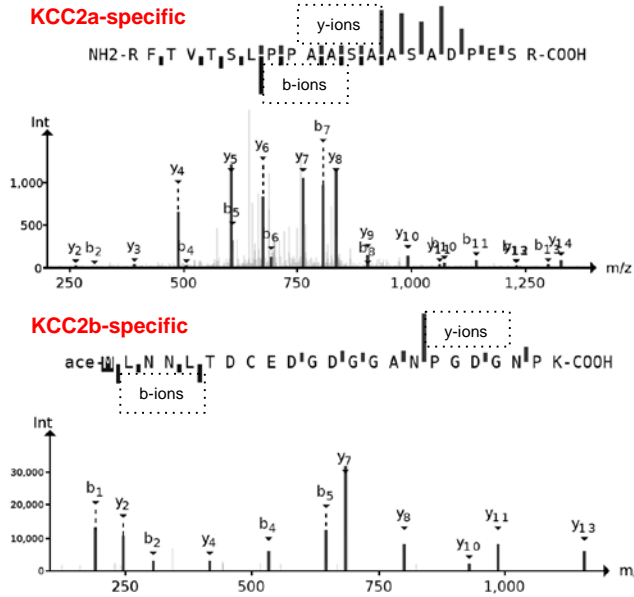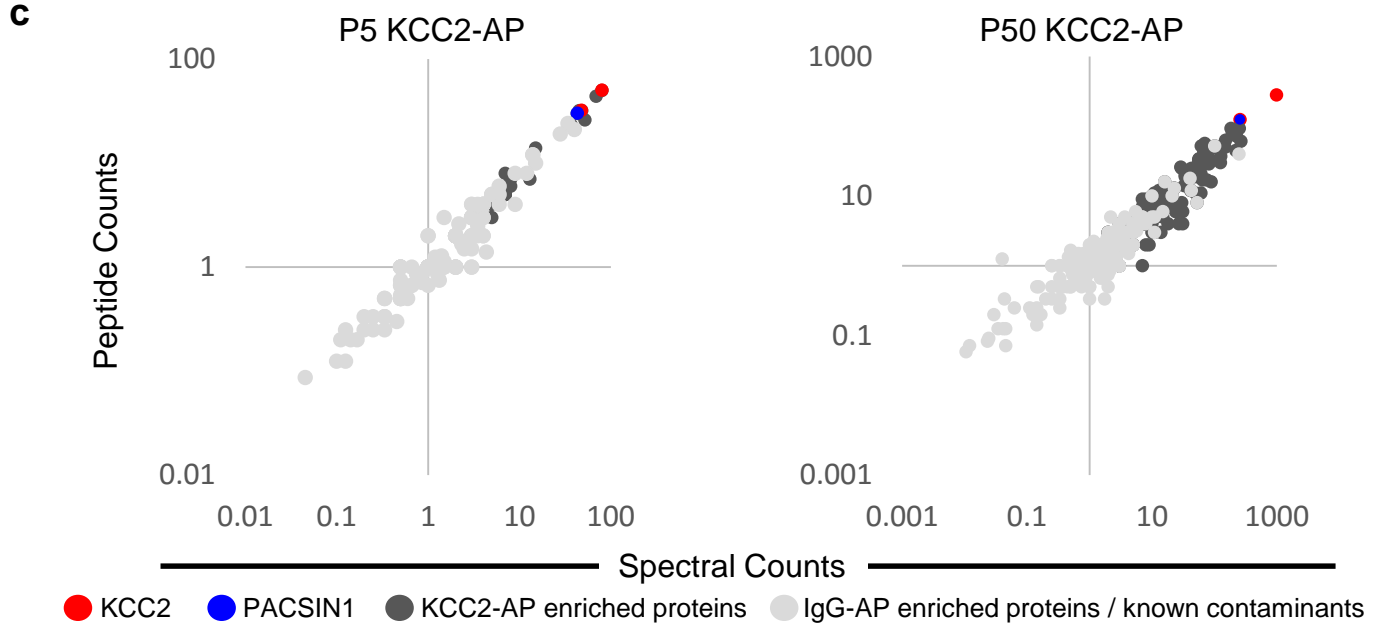



116 **The KCC2 interactome**

117 To build the KCC2 interactome, all potential KCC2 protein interactors were filtered according to their  
118 spectral count enrichment in the KCC2-APs, and normalized to IgG IPs. In the first pass filter grouping, we  
119 included proteins with at least 2 unique peptides and peptide-spectrum matches and a 3-fold increase in  
120 KCC2 spectral counts in the KCC2-AP in comparison to IgG-AP (**Figure 3 – Source Data 1**). This yielded  
121 ~75 high-confidence, putative-KCC2 partners. In the second pass filter grouping, we identified additional  
122 high-confidence putative-KCC2 partners by including those with only 1 unique peptide, or less than 3-fold  
123 KCC2-AP enrichment, if they met one of the following criteria: (a) the protein was a previously validated  
124 KCC2 physical/functional interactor; (b) the protein family already appeared in the first-pass filter; (c) the  
125 protein appeared as a single-peptide interactor across multiple experiments (e.g. multiple antibodies, or in  
126 lysates from both age timepoints). Including these additional proteins from the second pass filtering yielded  
127 186 putative-KCC2 partners. We next eliminated the 36 proteins that have been previously identified as  
128 commonly occurring spurious interactors in LC/MS experiments as indicated in the CRAPome database  
129 (**Figure 3 – Source Data 2**). (Mellacheruvu et al., 2013). Lastly, we added 31 proteins that have been  
130 previously established as KCC2-physical/functional partners but were not identified in our present LC-MS  
131 assay (**Figure 3 – Source Data 3**). By applying these filtering criteria and processes, we established a total  
132 list of 181 proteins in the KCC2 interactome (**Figure 3 – Figure Supplement 1**). More than half of these  
133 KCC2 interactors were exclusively enriched in KCC2-APs from the mature brain (85 proteins, ~57%  
134 overlap), while approximately one-third (41 proteins, ~27% overlap) were identified across both the  
135 developing and mature brain (**Figure 3 – Figure Supplement 2**). Only relatively small percentages were  
136 exclusively enriched in the developing brain (24 proteins, ~16% overlap).

137 We segregated the 181 protein KCC2 interactome into high-confidence (gold), moderate-confidence  
138 (silver), or lower confidence (bronze) putative KCC2-interactors (**Figure 3, Table 1 and Figure 3 – Source  
139 Data 4**). This tri-category segregation was based on the largest probability of a bait-prey pair across all  
140 replicate purifications, as indicated by the MaxP score (Choi et al., 2012). Gold KCC2-partners were those  
141 with normalized spectral count enrichments  $\geq 5$  and a - MaxP SAINT score  $\geq 0.89$ . Silver KCC2-partners  
142 were those with normalized spectral count enrichments between 3 and 5, and a MaxP score between 0.7

143 and 0.89. Bronze KCC2-patterns were all remaining proteins that were not designated as Gold or Silver.

144 Gold, Silver, and Bronze proteins were all included in subsequent network analysis.

145

146

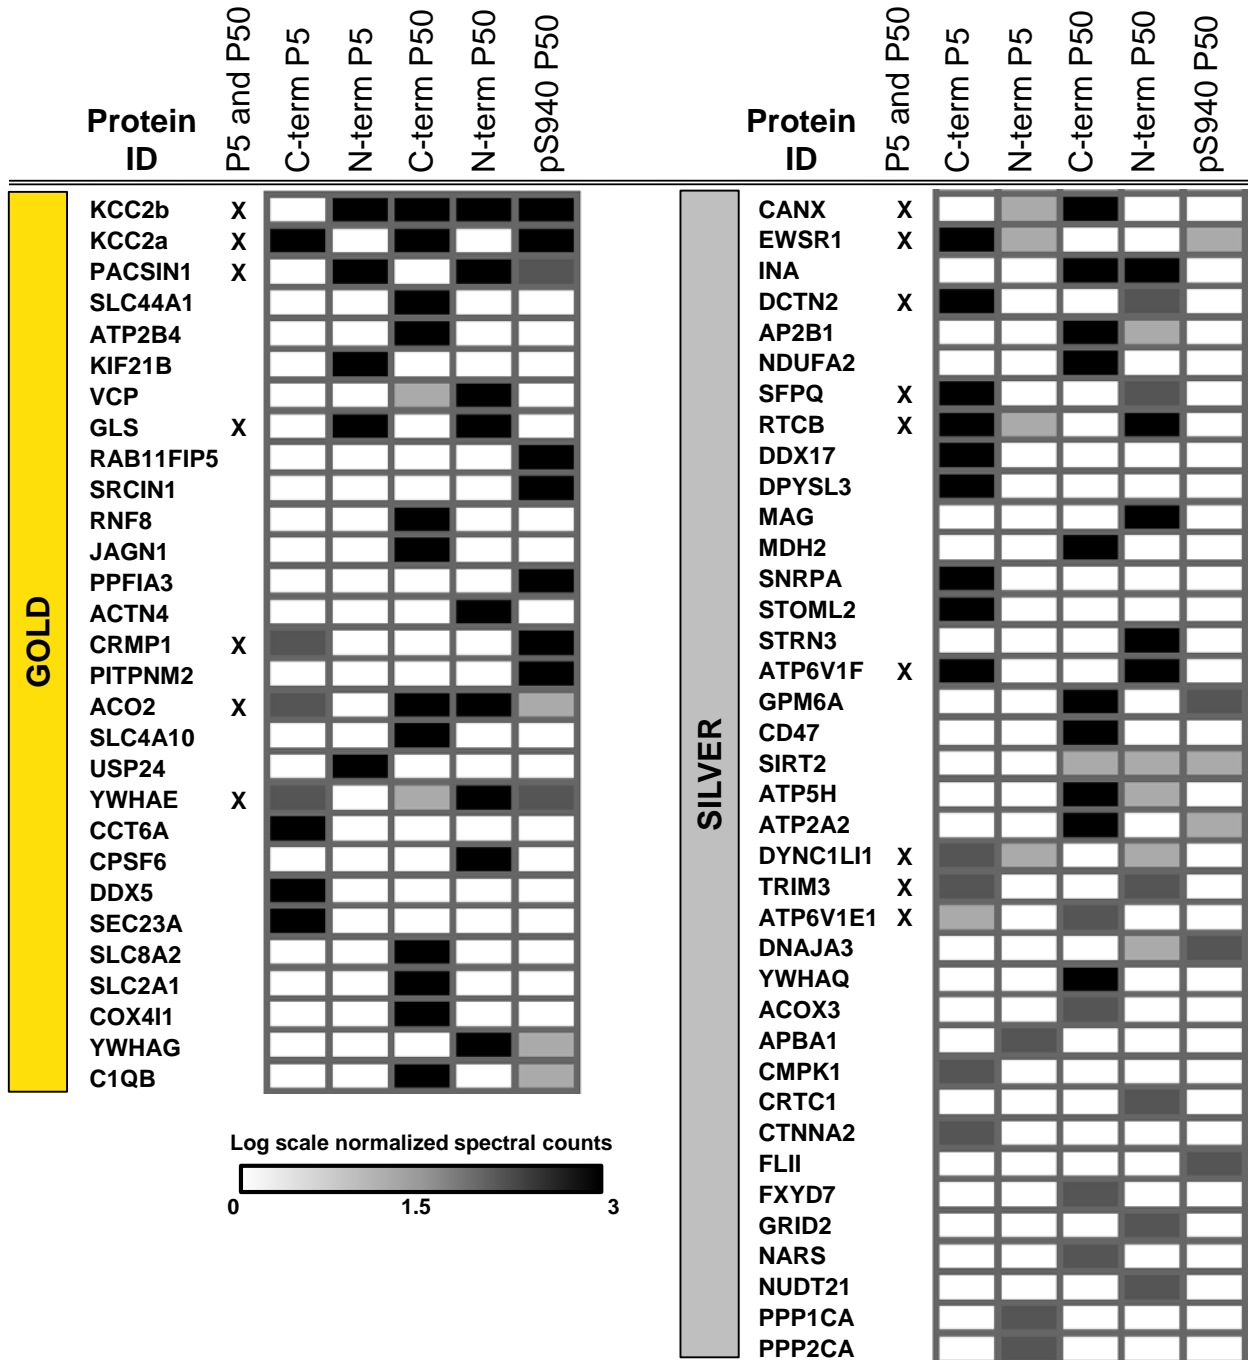

**Figure 3.** ME-AP reveals distinct KCC2 constituents in developing and mature brain. Summary of the top 70 proteins identified with high confidence across KCC2-ME AP in the developing and mature brain (3-fold spectral enrichment in KCC2-AP in comparison with IgG-AP). Heat map represents log scale spectral counts of individual proteins per antibody condition, expressed relative to global spectral counts. See Table 1 for a list of the transmembrane and soluble KCC2 interactors. The following source data and figure supplements are available for Figure 3:

Figure 3 – Figure Supplement 1: The SLC12A5/KCC2 interactome

Figure 3 – Figure Supplement 2: ME-AP proteomics identify the protein constituents of native KCC2

Figure 3 – Figure Supplement 3: Workflow for curating the KCC2 interactome

Figure 3 – Source Data 1: Spectra-peptide counts for KCC2-AP and IgG-AP.

Figure 3 – Source Data 2: CRAPome spurious interactors.

Figure 3 – Source Data 3: Previously ID KCC2 interactors.

Figure 3 – Source Data 4: KCC2 interactors identified in AP/MS categorized into gold, silver and bronze



147 **Members of KCC2 interactome are highly represented at excitatory synapses**

148 To interpret the potential functional role of KCC2-protein interactors we first segregated them based on  
149 their abundance at excitatory and inhibitory synapses. To perform this analysis we mapped the KCC2  
150 interactome to the excitatory synapse-enriched postsynaptic density (PSD) proteome (Collins et al., 2006),  
151 or the inhibitory synapse-enriched proteomes (iPSD, GABA<sub>A</sub>R, GABA<sub>B</sub>R, NLGN2, and GlyR) (Heller et al.,  
152 2012; Del Pino et al., 2014; Kang et al., 2014; Nakamura et al., 2016; Schwenk et al., 2016; Uezu et al.,  
153 2016). Interactome mapping revealed that ~43% of proteins in the KCC2 interactome (77/181) were  
154 exclusively enriched at excitatory synapses, while only ~2% of proteins (4/181) were exclusively enriched  
155 at inhibitory synapses (**Figure 4 a,b**). However, ~15% proteins (28/181) were mapped to both excitatory  
156 and inhibitory synapses, while ~39% proteins (71/181) did not map to either synapse.

157 To further examine the KCC2 interactome based on cellular functions we performed an Ingenuity  
158 Pathway Analysis (IPA) to segregate the KCC2-interactors into highly enriched Gene Ontology (GO)  
159 classes. Performing this IPA analysis revealed that KCC2 partners segregate into multiple cellular and  
160 molecular functional nodes, which we then combined into three broad categories that collectively had high  
161 p values: ion homeostasis, dendritic cytoskeleton rearrangement, and receptor trafficking (**Figure 4 c-e**;  
162 **Figure 4 – Source Data 1**). KCC2 has been previously associated with both ion homeostasis and dendritic  
163 spine morphology, and consistent with this previous work we identified previously characterized KCC2  
164 functional or physical interactors, including subunits of the sodium/potassium (Na<sup>+</sup>/K<sup>+</sup>) ATPase, including  
165 the previously characterized KCC2 interactor ATP1A2 (Ikeda et al., 2004), and Cofilin1, which was recently  
166 demonstrated to be important for KCC2-mediated plasticity at excitatory synapses (Chevy et al., 2015;  
167 Llano et al., 2015). The third category, receptor trafficking, has a denser network (clustering coefficient of  
168 0.63 and an average of ~3.7 neighbors) in comparison to the other networks, suggesting a tight link between  
169 KCC2 and proteins in this node. Notably, this analysis revealed multiple novel putative-KCC2 partners,  
170 including PACSIN1, SNAP25, RAB11FIP5, CK2, Dynm1 and AP2. All of these novel putative interactors  
171 have established functions in membrane recycling and/or trafficking of glutamate receptor subunits (Carroll  
172 et al., 1999; Lee et al., 2002; Vandenberghe et al., 2005; Pérez-Otaño et al., 2006; Selak et al., 2009; Sanz-  
173 Clemente et al., 2010; Anggono et al., 2013; Bacaj et al., 2015). In order to determine the spatiotemporal  
174 expression profiles of the KCC2 interactome, we first performed transcriptomic analysis and hierarchical

175 clustering of high-resolution human brain RNAseq data (available at (<http://brain-map.org>)). We observed  
176 that *SLC12A5* mRNA is expressed with several members members of the receptor trafficking node in the  
177 hippocampus (**Figure 5a**), amygdala, striatum, thalamus, cerebellum and cortex (**Figure 5 – Figure**  
178 **Supplement 1; Figure 5 – Source Data 1**).

179 In order to independently validate the KCC2 interactome, we proceeded to biochemical and functional  
180 analysis. We focused this validation analysis on proteins in the receptor trafficking category for two reasons:  
181 (i) the most abundant putative-KCC2 partner, PACSIN1 (PKC and CK2 substrate in neurons; also called  
182 as Syndapin1) is present in the receptor trafficking node; and (ii) the tightest KCC2-subnetwork exists in  
183 receptor trafficking node, indicating a dense interconnectivity between these proteins.

184

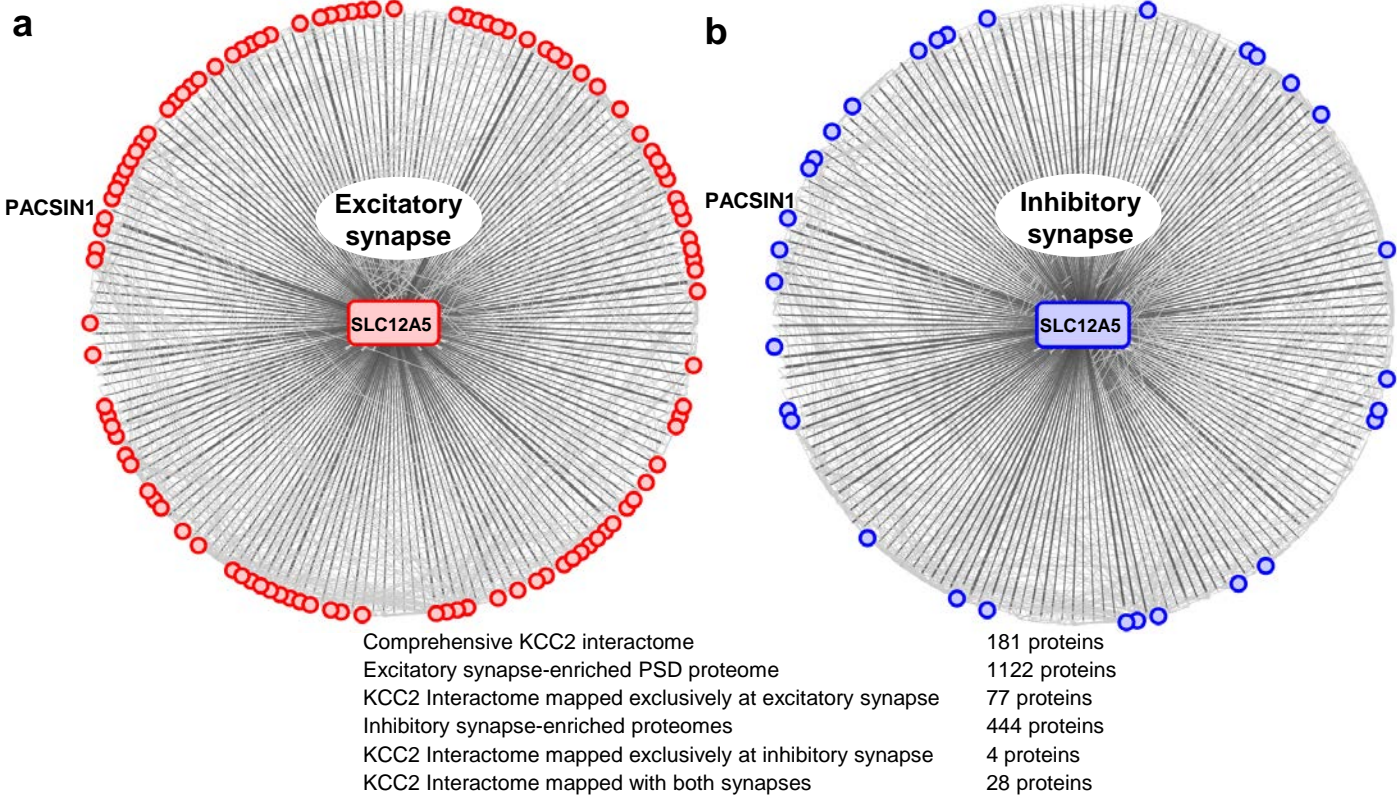

**c Ion homeostasis**

Clustering coefficient 0.391  
 Average # of neighbors 3

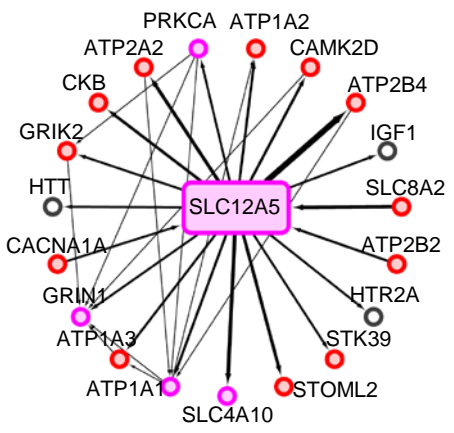

| IPA cellular function         | P-value  |
|-------------------------------|----------|
| Homeostasis of ion            | 4.14E-12 |
| Transport of inorganic cation | 1.3E-11  |
| Homeostasis of K+             | 6.37E-07 |
| Homeostasis of Na+            | 1.46E-05 |

**d Dendritic cytoskeleton**

Clustering coefficient 0.494  
 Average # of neighbors 2.7

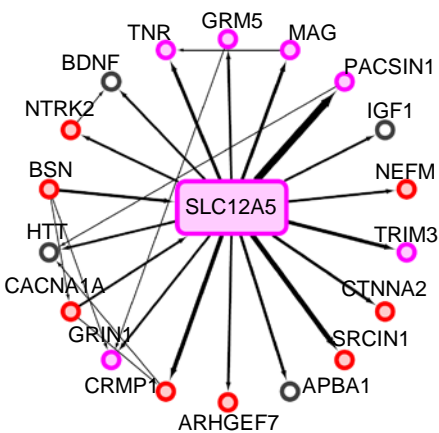

| IPA cellular function          | P-value  |
|--------------------------------|----------|
| Organization of cytoskeleton   | 4.09E-14 |
| Microtubule dynamics           | 3.27E-13 |
| Dendritic growth/branching     | 1.03E-11 |
| Morphology of dendritic spines | 7.22E-08 |

**e Receptor trafficking**

Clustering coefficient 0.630  
 Average # of neighbors 3.7

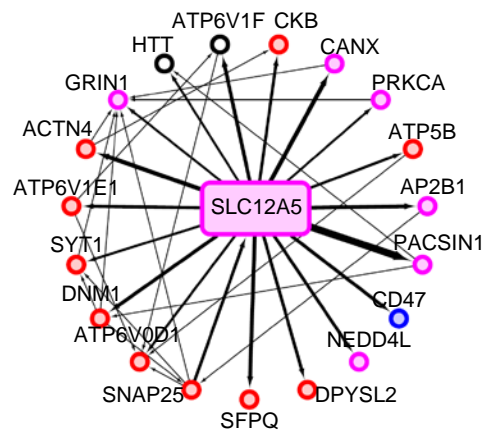

| IPA cellular function         | P-value  |
|-------------------------------|----------|
| Transport of vesicles         | 9.66E-09 |
| Receptor-mediated endocytosis | 1.58E-07 |
| Clathrin mediated endocytosis | 1.87E-07 |
| Endocytosis of vesicles       | 1.97E-06 |

- KCC2 interactome (U) Excitatory synapses
- KCC2 interactome (U) Inhibitory synapses
- KCC2 interactome (U) Excitatory synapses (U) Inhibitory synapses
- KCC2 interactome (U) unmapped at excitatory and inhibitory synapses

**Figure 4.** Members of the KCC2 interactome are highly represented at excitatory synapses. **(a)** The KCC2 interactome mapped to the excitatory synapse-enriched postsynaptic density proteome. Pink circles indicate proteins mapped to excitatory synapses, thickness of the edge denotes the number of spectral enrichment (KCC2/IgG) from the log scale. **(b)** Similar to a, but for the KCC2 interactome mapped to the inhibitory synapse-enriched proteomes for GABA<sub>A</sub>Rs, GABA<sub>B</sub>Rs, NLGN2, and GlyRs. **(c)** IPA revealing members of the KCC2 ME-AP involved in ion homeostasis; the thickness of the line represents the spectral enrichment (KCC2/IgG). **(d)** Similar to c, but for proteins involved in dendritic cytoskeleton rearrangement. **(e)** Similar to c, but for proteins involved in receptor recycling/endocytosis/trafficking. Source data for Figure 4 include: Figure 4 – Source Data 1: Ingenuity Pathway Analysis.

185 **PACSIN1 is a novel native-KCC2 binding partner**

186 To biochemically and functionally validate our KCC2 interactome we chose to focus on the putative KCC2-  
187 PACSIN1 interaction. The rationale for this selection was based on the following: (1) PACSIN 1 is the most  
188 abundant KCC2 interactor in our analysis, with a high normalized spectral count ratio and a high MaxP  
189 score, and with extensive amino acid sequence coverage (**Figure 5 – Figure Supplement 2**); (2) PACSIN1  
190 is a substrate for PKC, and PKC is a key regulator of KCC2 (Lee et al., 2007); (3) PACSIN1 is a substrate  
191 for CK2, and our analysis revealed CK2 as a putative KCC2-interactor; (4) PACSIN1 is abundant at both  
192 excitatory and inhibitory synapses; and (5) PACSIN1 was identified as an abundant KCC2 interactor using  
193 multiple antibodies (N-terminal and pS940).

194 To independently verify whether KCC2 associated with PACSIN1, we performed a co-  
195 immunoprecipitation assay from adult whole-brain native membrane preparations. We found that anti-  
196 KCC2b antibodies, but not control IgY antibodies, co-immunoprecipitated with PACSIN1 (**Figure 5b**). Using  
197 a previously well-validated PACSIN1 antibody (Anggono et al., 2013) we confirmed this interaction in the  
198 reverse direction, indicating the existence of a KCC2-complex with PACSIN1 *in vivo* (**Figure 5b**). Consistent  
199 with our ability to co-immunoprecipitate KCC2 and PACSIN1, we found that the expression profiles of KCC2  
200 and PACSIN1 are temporally aligned in the mouse brain (**Figure 5c**). To determine whether native-KCC2  
201 complexes are stably associated with PACSIN1, we performed an antibody-shift assay coupled with two-  
202 dimensional BN-PAGE (2D BN-PAGE), which is a strategy that has been used previously to examine the  
203 native assemblies of several transmembrane protein multimeric complexes (Schwenk et al., 2010, 2012),  
204 including that of native-KCC2 (Mahadevan et al., 2014). Using this approach, we first verified that the  
205 addition of N-terminal KCC2b antibodies could shift a proportion of native-KCC2 to higher molecular  
206 weights, in comparison to IgY control antibodies (**Figure 5d**). Next, we observed that this antibody-induced  
207 shift in native-KCC2b using N-terminal antibody also shifted a population of native-PACSIN1 to comparable  
208 higher molecular weights (**Figure 5d**). Collectively, these experiments establish native-PACSIN1 as a novel  
209 KCC2-binding partner in whole brain tissue.

210 The PACSIN family of proteins contains 3 members that share ~90% amino acid identity (Modregger et  
211 al., 2000). PACSIN1 is neuron-specific and is broadly expressed across multiple brain regions; PACSIN2  
212 is ubiquitous and is abundant in cerebellar Purkinje neurons (Anggono et al., 2013; Cembrowski et al.,



213 2016), and PACSIN3 is restricted to muscle and heart (Modregger et al., 2000). To determine which  
214 members of the PACSIN family binds to KCC2, we transfected PACSIN constructs (Anggono et al., 2013),  
215 with myc-KCC2b in COS-7 cells and performed co-immunoprecipitation. We observed that KCC2 robustly  
216 associates with PACSIN1, weakly interacts with PACSIN2, and does not interact with PACSIN3 (**Figure**  
217 **5e**). PACSIN1 contains a membrane-binding F-BAR domain, a SH3 domain that binds to phosphorylated  
218 targets, and a VAR (variable) region (Kessels and Qualmann, 2004, 2015). In order to determine the  
219 PACSIN1 region that is required for KCC2 binding we repeated our co-immunoprecipitation assays in COS-  
220 7 cells, but this time we used previously characterized PACSIN1 deletion constructs (Anggono et al., 2013)  
221 (**Figure 5f**). We discovered that removing either the SH3 or the F-BAR region did not disrupt the  
222 KCC2:PACSIN1 interaction, indicating that they are not necessary for KCC2 binding. In an analogous  
223 result, neither the SH3 domain nor the F-BAR domain could interact with KCC2. However, KCC2 robustly  
224 co-precipitated with PACSIN1 when the VAR region was co-expressed with KCC2, indicating that the VAR  
225 region is sufficient to mediate the KCC2 interaction  
226

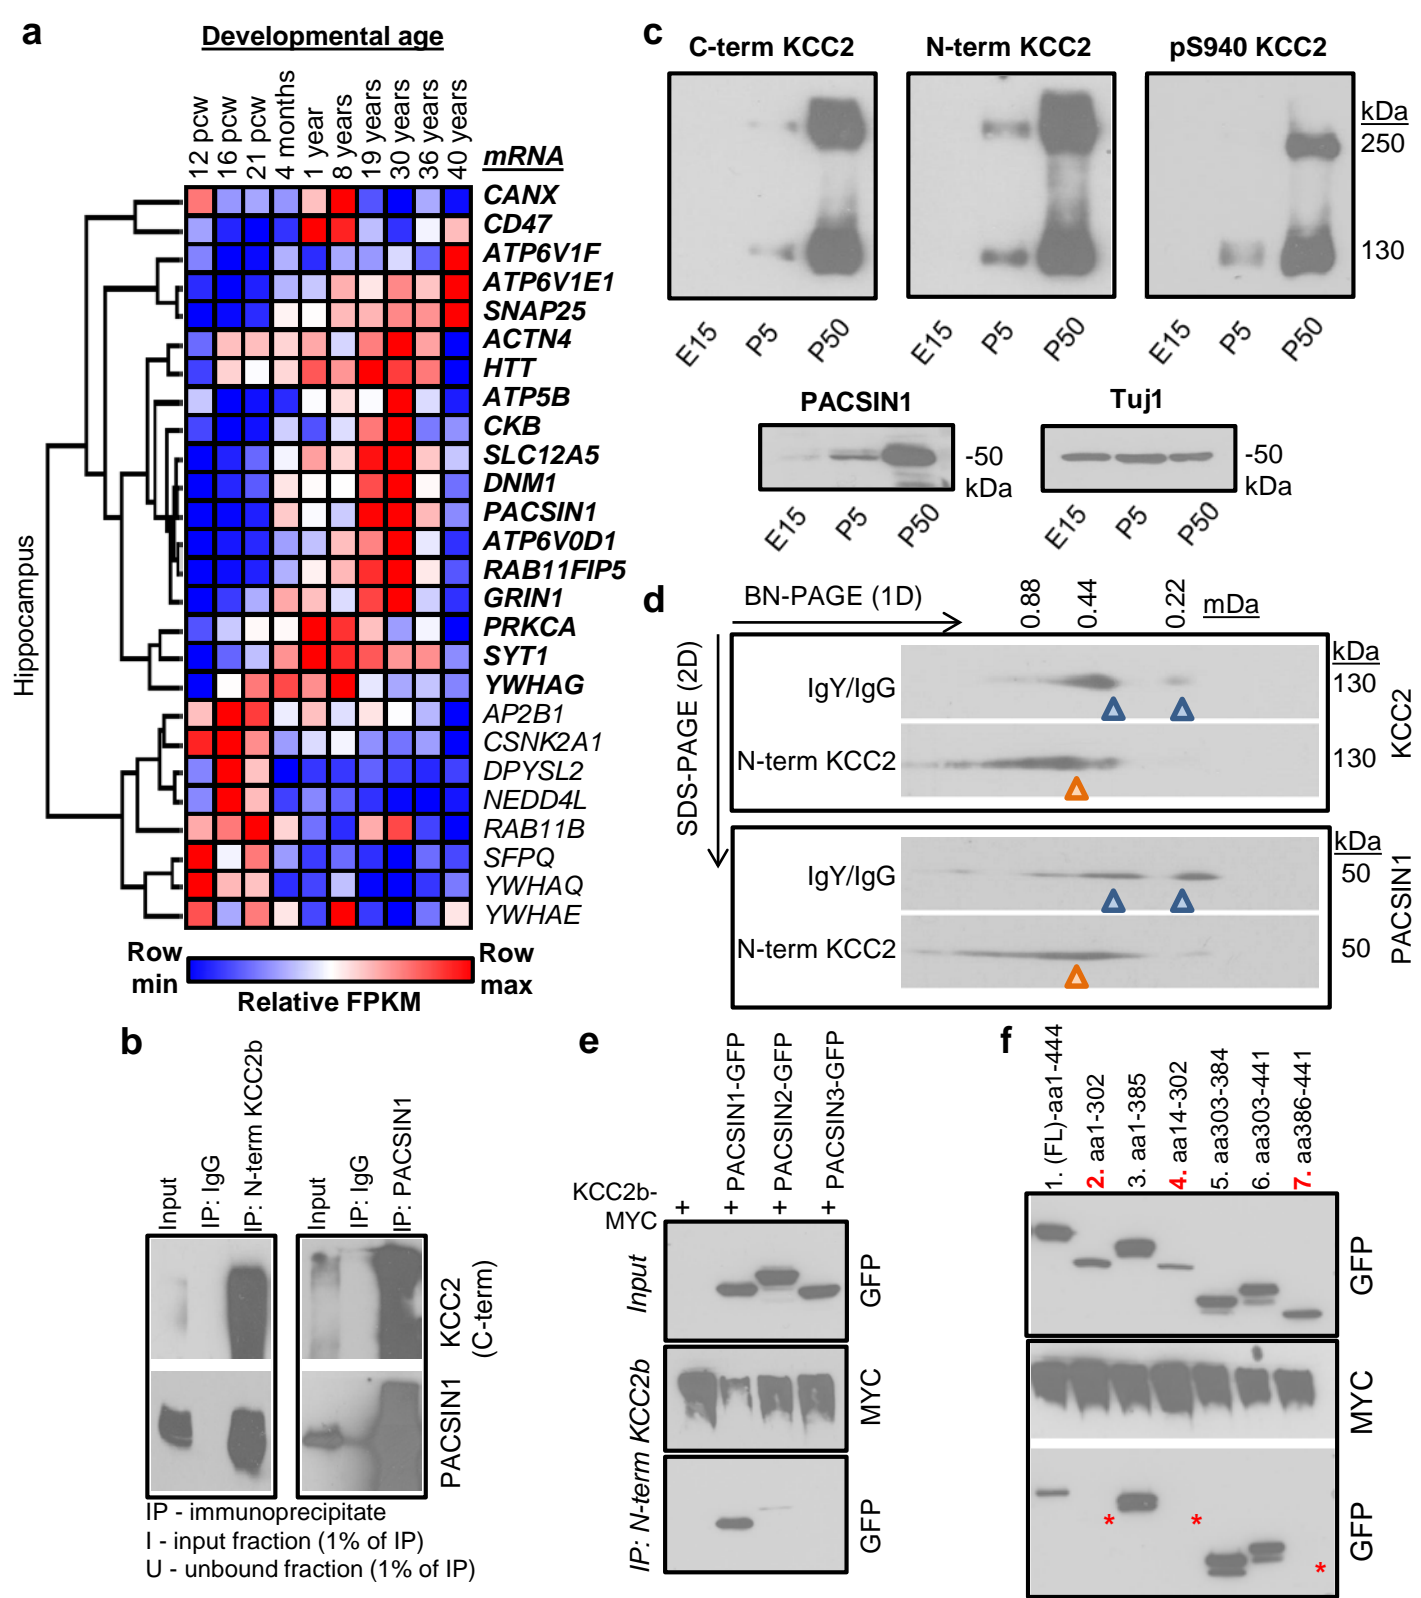

**Figure 5.** Characterization of the PACSIN1-KCC2 interaction. **(a)** Spatiotemporal expression patterns of *SLC12A5* and members of the receptor trafficking node in the human brain **(b)** Native KCC2 complexes from  $C_{12}E_9$ -solubilized whole-brain membrane fractions immunoprecipitated with IgY or anti-N-term KCC2 (left) and IgG or anti-PACSIN1 (right), and immunoblotted with C-term KCC2 and PACSIN 1 antibodies. **(c)** Western blot of KCC2 and PACSIN1 during development from  $C_{12}E_9$ -solubilized hippocampal membrane fractions (probed with the antibodies indicated above). **(d)** Antibody-shift assay followed by 2D-BN-PAGE separation using  $C_{12}E_9$ -solubilized whole-brain membrane fractions, incubated with antibodies indicated on left. **(e)** Coimmunoprecipitation experiments performed in COS7 cells transfected with myc-tagged KCC2b and GFP-tagged PACSIN1/2/3 constructs, immunoprecipitated with anti-N-term KCC2. **(f)** Immunoblot of immunoprecipitates from transfected COS7 cell lysates. \* indicate the lanes where PACSIN1 lacks the variable region between ~aa325-383. independent biological replicates: 5e = 4; 5f = 3; 5b,c,d = 2. The following source data and figure supplements are available for Figure 5: Figure 5 - Source Data 1: Allan Brain Atlas data.

Figure 5 – Supplement Figure 1: Spatiotemporal expression patterns of *SLC12A5* and members of receptor trafficking node.

Figure 5 – Supplement Figure 2: The primary amino acid sequence coverage of PACSIN1

227 **PACSIN1 is a negative regulator of KCC2 expression and function in hippocampal neurons**

228 KCC2 dysregulation has emerged as a key mechanism underlying several brain disorders including  
229 seizures (Fiumelli et al., 2013; Stödberg et al., 2015; Saitsu et al., 2016), neuropathic pain (Coull et al.,  
230 2003), schizophrenia (Tao et al., 2012), and autism spectrum disorders (ASD) (Cellot and Cherubini, 2014;  
231 Tang et al., 2015). However there are currently no existing KCC2 enhancers approved for clinical use, and  
232 thus there is a critical need to identify novel targets for the development of KCC2 enhancers. To determine  
233 whether PACSIN1 may be a potential target for regulating KCC2 function, we assayed for KCC2 function  
234 following PACSIN1 knockdown. We chose to assay for the canonical KCC2 function of Cl<sup>-</sup> extrusion, as the  
235 loss of Cl<sup>-</sup> homeostasis and thus synaptic inhibition, is causal for several neurological disorders (Coull et  
236 al., 2003; Huberfeld et al., 2007; Tao et al., 2012; Cellot and Cherubini, 2014; Toda et al., 2014; Kahle et  
237 al., 2014; Puskarjov et al., 2014; Stödberg et al., 2015; Banerjee et al., 2016; Saitsu et al., 2016; Tang et  
238 al., 2016). We assayed KCC2-mediated Cl<sup>-</sup> extrusion by performing whole cell recordings of the reversal  
239 potential for GABA (E<sub>GABA</sub>) in cultured hippocampal neurons while loading the neuron with Cl<sup>-</sup> to drive KCC2  
240 transport. When neurons were virally transfected with a previously validated PACSIN1 silencing shRNA  
241 construct (Anggono et al., 2013), E<sub>GABA</sub> was hyperpolarized relative to neurons transfected with the control  
242 shRNA construct (**Figure 6a,b**; control shRNA:  $-28.62 \pm 3.07$  mV, n = 9; PACSIN1 shRNA:  $-37.86 \pm 1.73$   
243 mV, n = 11; t(18)=2.744, p = 0.013), with no significant change in the GABA<sub>A</sub>R conductance (**Figure 6a,c**;  
244 control shRNA:  $6.93 \pm 1.32$  mV, n = 9; PACSIN1 shRNA:  $12.96 \pm 2.71$  mV, n = 11; t(18)=1.86, p = 0.079).  
245 In addition, we performed gramicidin-perforated patch clamp recordings to maintain Cl<sup>-</sup> gradients and a  
246 significant hyperpolarizing shift in E<sub>GABA</sub> compared to whole cell recordings (**Figure 6d**; whole-cell  
247 recordings n = 11; gramicidin recordings n = 6; t(15)=4.021, p=0.001). Thus, PACSIN1 silencing increases  
248 KCC2-mediated Cl<sup>-</sup> extrusion in neurons, which we predicted might be due to an increase in KCC2  
249 expression. To test our prediction we performed immunofluorescent staining of endogenous KCC2 in  
250 cultured hippocampal neurons transfected with either shRNA-control or shRNA-PACSIN1. We observed a  
251 significant increase in KCC2 fluorescence in neurons expressing PACSIN1-shRNA in comparison with  
252 control shRNA (**Figure 6e**; control shRNA:  $58.86 \pm 2.53$  A.U., n = 32; PACSIN1 shRNA:  $74.05 \pm 2.53$  A.U.,  
253 n = 32; t(31)=5.272, p < 0.0001). Taken together, our electrophysiological recordings and  
254 immunofluorescence results demonstrate that a reduction in PACSIN1 results in increased KCC2

255 expression and an increase in the strength of inhibition (hyperpolarization of  $E_{GABA}$ ). If PACSIN1 is a *bona*  
256 *fide* negative regulator of KCC2 expression, then overexpressing PACSIN1 should produce a reduction in  
257 KCC2 expression. To test this prediction we performed immunofluorescent staining of endogenous KCC2  
258 in cultured hippocampal neurons transfected with either eGFP or PACSIN1-eGFP. We observed a  
259 remarkable loss of KCC2 immunofluorescence when PACSIN1 was overexpressed in comparison to control  
260 eGFP (**Figure 6f**; control eGFP:  $62.1 \pm 2.7$  A.U.,  $n = 23$ ; PACSIN1-eGFP:  $11.31 \pm 3.17$  A.U.,  $n = 16$ ;  
261  $t(37)=12.13$ ,  $p < 0.0001$ ).

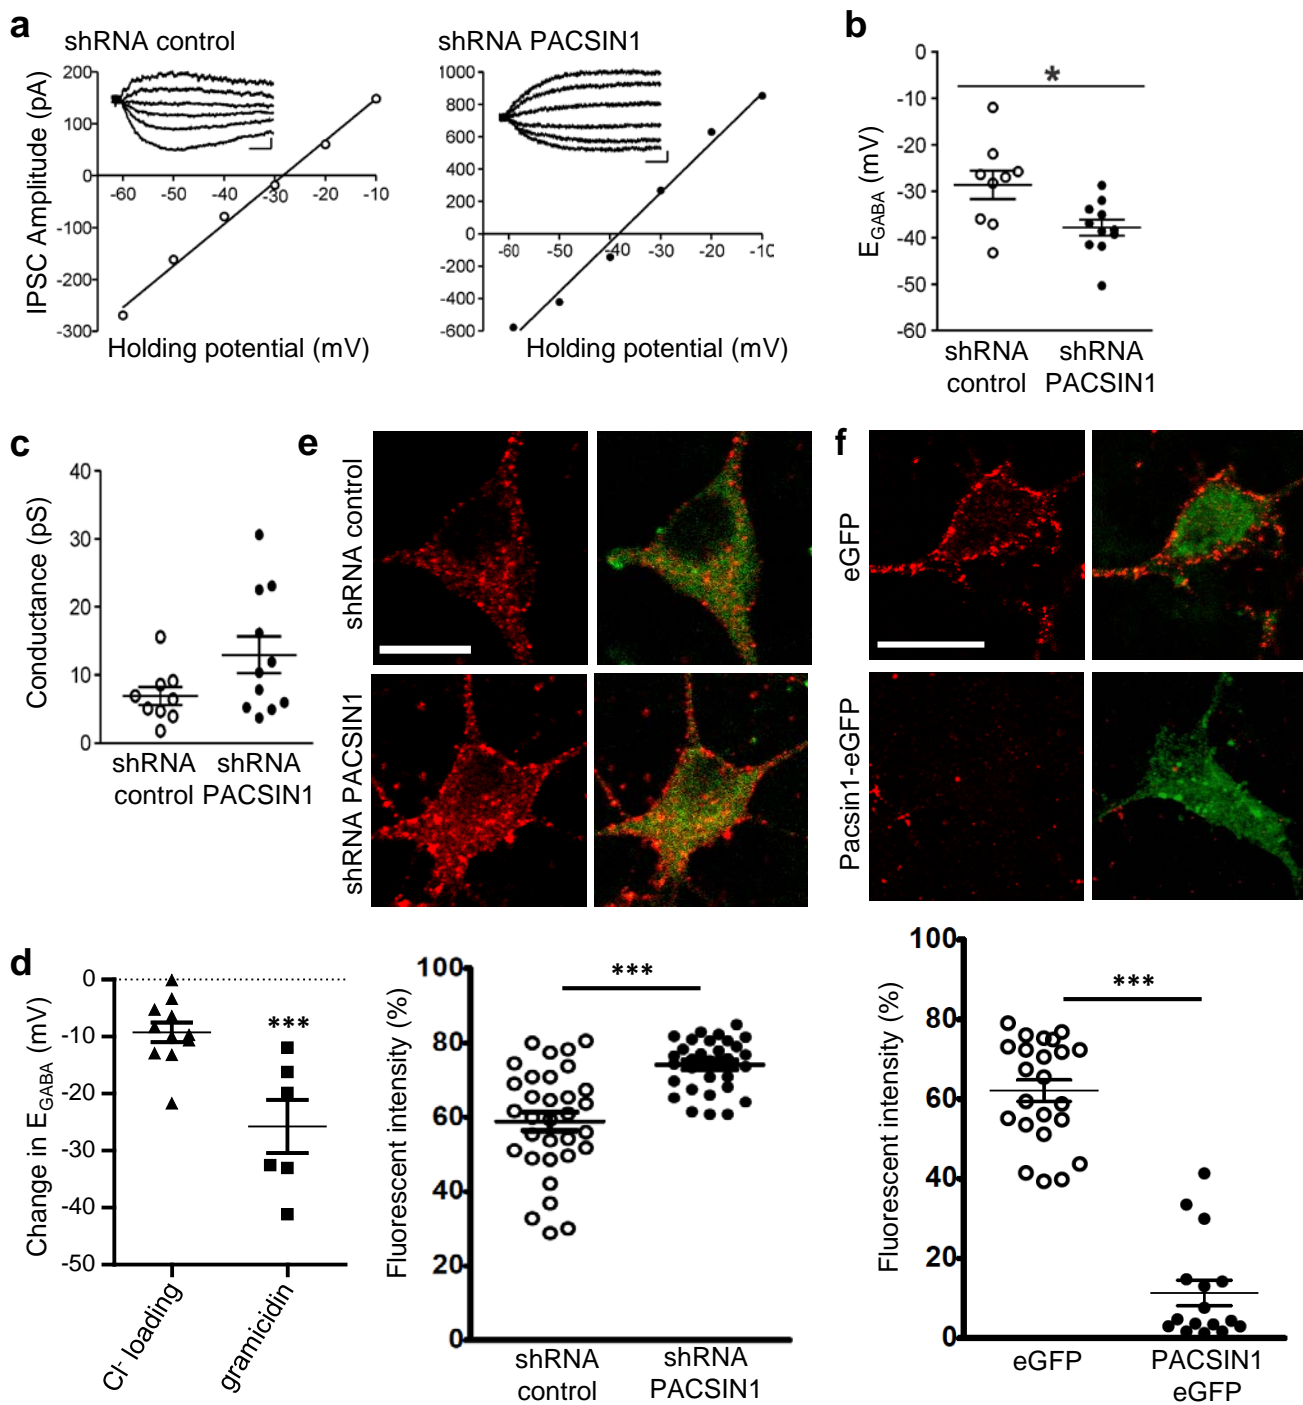

**Figure 6.** PACSIN1 is a negative regulator of KCC2 expression and function. **(a)** Example IV curves measuring  $E_{GABA}$  using Cl<sup>-</sup>-loading through whole-cell configuration from cultured hippocampal neurons transduced with control shRNA (n=9) or PACSIN1 shRNA (n=11). Summary of **(b)**  $E_{GABA}$  and **(c)** synaptic conductance from all experiments similar to a (mean  $\pm$  sem). **(d)** Change in  $E_{GABA}$  between whole-cell (n=11) and gramicidin-perforated (n=6) recordings (mean  $\pm$  sem). **(e)** Example confocal microscopic immunofluorescent images from cultured hippocampal neurons transduced with control shRNA (n=32) or PACSIN1 shRNA (n=32) and stained with anti-KCC2 (red; scale bar, 10 $\mu$ m); green immunostain reports transfection. Below: summary of fluorescence intensities (mean  $\pm$  sem). **(f)** Similar to e, except neurons were transduced with either control eGFP (n=23) or PACSIN1-eGFP (n=16). n values for all experiments on cultured neurons were obtained from a minimum of 3 independent sets of cultures. Statistical significance was determined using student's t-tests (two-tailed); \* p < 0.05, \*\*\* p < 0.001

262 **DISCUSSION**

263 We determined that the mouse brain KCC2 functional interactome is comprised of 181 proteins; and by  
264 mapping the KCC2 interactome to excitatory and inhibitory synapse proteomes and performing ingenuity  
265 pathway analysis, we determined that KCC2 partners are highly enriched at excitatory synapses and form  
266 a dense network with proteins involved in receptor trafficking. We validated the KCC2-interactome by  
267 biochemically characterizing the interaction between KCC2 and the most abundant protein in the  
268 interactome, PACSIN1. Functional validation of the KCC2-PACSIN1 interaction revealed that PACSIN1  
269 robustly and negatively regulates KCC2 expression. While ion channels and GPCRs are known to  
270 predominantly exist in large multi-protein complexes (Husi et al., 2000; Berkefeld et al., 2006; Collins et  
271 al., 2006; Müller et al., 2010; Schwenk et al., 2010, 2012, 2014, 2016; Nakamura et al., 2016; Pin and  
272 Bettler, 2016), similar studies on solute carrier proteins (transporters) are still in their infancy (Snijder et al.,  
273 2015). Based on the critical importance of SLC transporters as therapeutic targets in both rare and common  
274 diseases (César-Razquin et al., 2015; Lin et al., 2015), including that of KCC2 in human neurological  
275 diseases (Blaesse et al., 2009; Medina et al., 2014), our present study also fills a general gap in the field  
276 of CNS transporter proteomics.

277 We report that native-detergents C<sub>12</sub>E<sub>9</sub> and CHAPS extract KCC2 isoforms differentially (**Figure 1b**). A  
278 common caveat of isoform-counting in shot-gun proteomic experiments such as ours, is the problem of  
279 protein inference (Nesvizhskii and Aebersold, 2005). While we were able to discriminate KCC2 isoforms-a  
280 and -b, based on the presence of their unique peptides in their N-terminus (**Figure 1c**), it is not possible to  
281 categorize the remaining peptides to either isoform a or b due to their extensive shared homology.  
282 Therefore targeted proteomics such as selected-reaction monitoring would be required to accurately  
283 establish the abundances of KCC2 isoforms. We also report that native-detergents C<sub>12</sub>E<sub>9</sub> and CHAPS pull-  
284 down different subsets of proteins along with some common interactors (**Figure 1b**). It is intriguing to note  
285 that there were several putative KCC2-partners uniquely identified with this detergent (SLC44A1, ATP2B4,  
286 RNF8, JAGN1, CD47, SLC2A1 (**Figure 1b**). Although we did not perform exhaustive proteomics with  
287 CHAPS-based KCC2 extractions, because of the presence of these high-confidence proteins in the  
288 CHAPS-based KCC2 LC/MS, we did include these proteins in the KCC2-interactome. This demonstrates

289 that detergent stabilities of KCC2 protein complexes are distinct, in line with other recent ion channel  
290 proteomic studies (Müller et al., 2010; Schulte et al., 2011; Schwenk et al., 2012).

291 Our KCC2 LC/MS identified previously established KCC2 proteins interactors, including ATP1A2 (Ikeda  
292 et al., 2004), CFL1 (Chevy et al., 2015; Llano et al., 2015) and CKB (Inoue et al., 2004, 2006), which add  
293 confidence to the validity of this interactome. We were initially surprised at the absence of other previously  
294 identified KCC2 interactors, including: Neto2 (Ivakine et al., 2013; Mahadevan et al., 2015), GluK2  
295 (Mahadevan et al., 2014; Pressey et al., 2017), 4.1N (Li et al., 2007), beta-pix (Chevy et al., 2015; Llano et  
296 al., 2015), RCC1 (Garbarini and Delpire, 2008), or signaling molecules PKC (Lee et al., 2007), WNK, SPAK  
297 and OSR (Friedel et al., 2015). The absence of these previously identified interactors may be due to any of  
298 the following caveats, which have been well recognized in previous ion channel and GPCR proteomic  
299 studies: (1) these interactions may be weak, transient, mediated by posttranslational modifications (Schulte  
300 et al., 2011), or mediated by intermediary partners; (2) these interactions are under-represented because  
301 they are restricted to specific brain regions; (3) antibody-epitope binding knocked-off endogenous  
302 interactions; (4) despite using the C<sub>12</sub>E<sub>9</sub>-based solubilization strategy that is known to stabilize ion pumps  
303 and transporters (Romero, 2009; Babu et al., 2010; Ramachandran et al., 2013) particular interactions may  
304 be better preserved by other detergent conditions.

305 Single particle tracking of surface KCC2 has revealed that ~66% of KCC2 is located synaptically  
306 (Chamma et al., 2012, 2013). While the density of surface KCC2 was not reportedly different between  
307 excitatory and inhibitory synapses, KCC2 was shown to dwell longer at excitatory synapses. Our  
308 observation that KCC2 interacting proteins are primarily enriched at excitatory synapses in comparison to  
309 inhibitory synapses is in line with this increased confinement of KCC2 at excitatory synapses. The presence  
310 of KCC2 at excitatory synapses raises some interesting questions: How does KCC2-mediated Cl<sup>-</sup> extrusion  
311 regulate hyperpolarizing inhibition if it is preferentially localized near excitatory synapses? Why are the  
312 KCC2 partners exclusive at the inhibitory synapses less represented when compared with excitatory  
313 synapses? One potential answer to both of these questions is that because of the difficulty in identifying  
314 components of inhibitory synapses our knowledge of the proteins present at these structures is incomplete.  
315 Despite the fact that our network mapping incorporated 444 proteins known to be enriched at inhibitory  
316 synapses (Heller et al., 2012; Del Pino et al., 2014; Kang et al., 2014; Nakamura et al., 2016; Schwenk et

317 al., 2016; Uezu et al., 2016), it is possible that we identified a smaller representation of inhibitory synapse-  
318 specific KCC2 partners in our present study. Another possibility is that KCC2 'moon-lights' between  
319 inhibitory and excitatory synapses, as previously suggested (Blaesse and Schmidt, 2014). Our interactome  
320 supports this hypothesis as we identified 28 proteins that are enriched at both synapses. However, future  
321 studies are required to systematically examine whether the KCC2 complexes containing these 28 proteins  
322 enriched at both loci are similar or distinct. While the notion that excitatory and inhibitory synapses are  
323 distinct structures is widely accepted, emerging evidence from cortex suggests this may not be strictly true  
324 (Chiu et al., 2013; Higley, 2014). Under circumstances where excitatory and inhibitory synapses are in close  
325 physical proximity, the molecular complex involving KCC2 and these moonlighting proteins are ideally  
326 placed to execute cell-intrinsic E/I balance regulation, a hypothesis stemming from our present study that  
327 requires rigorous experimental testing.

328 Ever since the first discovery that KCC2 participates in the regulation of dendritic structures (Li et al.,  
329 2007), several studies have demonstrated 4.1N as a critical mediator of this non-canonical transporter-  
330 independent KCC2 function (Horn et al., 2010; Gauvain et al., 2011; Chamma et al., 2013; Fiumelli et al.,  
331 2013). Recently however, additional molecular players underlying this phenomenon, including COFL1, and  
332 ARHGEF7 (Beta-pix) have been identified to interact with KCC2 (Chevy et al., 2015; Llano et al., 2015). In  
333 the present study, we identify diverse high confidence (Gold) cytoskeletal organizers belonging to distinct  
334 protein families such as CRMP proteins, SRCIN1, VCP, KIF21B, previously unsuspected to mediate KCC2-  
335 dependant non-canonical function. However the precise relation between KCC2-dependant non-canonical  
336 functions and these putative partners is not currently known.

337 PACSIN1 is a well-established endocytic adapter protein that regulates the surface expression of distinct  
338 glutamate (Anggono et al., 2006, 2013; Pérez-Otaño et al., 2006; Widagdo et al., 2016) and glycine  
339 receptors (Del Pino et al., 2014). We reveal PACSIN1 as a novel negative regulator of KCC2 expression in  
340 central neurons. We previously reported that native-KCC2 assembles as a hetero-oligomer that migrates  
341 predominantly above ~400kDa (Mahadevan et al., 2014, 2015). Similar to KCC2, native-PACSIN1 also  
342 migrates above ~400kDa (Kessels and Qualmann, 2006). Here we report that while *SLC12A5* and  
343 *PACSIN1* mRNA transcripts increase in parallel in multiple brain regions throughout development,  
344 PACSIN1 overexpression remarkably decreases total KCC2 abundance. How does PACSIN1 exist in a



345 stable complex with KCC2 when it negatively regulates KCC2 expression? Since KCC2 and PACSIN1 are  
346 both dynamically regulated by phosphorylation and PKC (Anggono et al., 2006; Lee et al., 2007; Clayton  
347 et al., 2009; Kahle et al., 2013), we predict that upon KCC2 phosphorylation, PACSIN1 uncouples from  
348 KCC2 rendering it incapable of negatively regulating KCC2. Numerous pathological situations are  
349 associated with decreased KCC2 phosphorylation at Ser940 (Wake et al., 2007; Lee et al., 2011; Sarkar et  
350 al., 2011; Toda et al., 2014; Ford et al., 2015; Mahadevan et al., 2015; Silayeva et al., 2015; Leonzino et  
351 al., 2016; Mahadevan and Woodin, 2016), resulting in decreased transporter expression and/or function. It  
352 will be important to determine whether any of these neurological deficits stem from PACSIN1-mediated  
353 decreases in KCC2. In the present study, we demonstrate that PACSIN1 shRNA increases KCC2  
354 expression and strengthens inhibition, indicating that PACSIN1 is a target for intervention to upregulate  
355 KCC2 during pathological states.

356

357

## 358 MATERIALS AND METHODS

### 359 Animals and approvals

360 All experiments were performed in accordance with guidelines and approvals from the University of  
361 Toronto Animal Care Committee and the Canadian Council on Animal Care. Animals of both sexes from  
362 wild-type mice, C57/Bl6 strain (Charles River Laboratories) were used throughout. Animals were housed  
363 in the Faculty of Arts and Science Biosciences Facility (BSF) in a 12h light: 12h d cycle, with 2-5  
364 animals/cage.

365

### 366 Detergents

367 All biochemical preparations and centrifugations were performed at 4 °C as previously described (Ivagine  
368 et al., 2013; Mahadevan et al., 2014, 2015). Systematic analysis of detergent solubility, and migration of  
369 native-KCC2 from crude membrane fractions were performed according to the workflow described in  
370 **Figure 1 – Figure Supplement 1**. The following 8 detergents (or detergent combinations) were used to  
371 solubilize whole brain membranes: C<sub>12</sub>E<sub>9</sub> (1.5%), CHAPS (1.5%), DDM, (1.5%), DOC (1%), NP40 (1%),  
372 Triton-X-100 (1%), Triton-X-100 (1%) + DOC (1%), SDS (0.1%) + DOC (1%) + NP40 0.5%).

373

### 374 Purification of KCC2 and in vivo co-immunoprecipitation

375 Mice (~P5, P50) were sacrificed, and brains were removed and homogenized on ice in PBS using a  
376 glass-Teflon homogenizer, followed by brief low-speed centrifugation. Soft-pellets were re-suspended in  
377 ice-cold lysis buffer [Tris-HCl, 50 mM, pH 7.4; EDTA, 1 mM; protease and phosphatase inhibitor mixture  
378 (Roche)], homogenized, and centrifuged for 30 minutes at 25,000 × g. Membrane pellets were re-  
379 suspended in solubilization buffer (4Xw/v) [Tris-HCl, 50 mM, pH 7.4; NaCl, 150 mM; EDTA, 0.05 mM;  
380 selected detergent(s), and protease and phosphatase inhibitor mixture(Roche)], solubilized for 3 hours on  
381 a rotating platform at 4 °C, and centrifuged for 1 hour at 25,000 × g. For KCC2 and control co-  
382 immunoprecipitations, 20-100 µl GammaBind IgG beads were incubated on a rotating platform with the  
383 following antibodies (5-100 µg antibody) for 4 hours at 4 °C in cold 1X PBS:

- 384 • mouse polyclonal C-term KCC2 antibody, Neuromab #N1/12, RRID AB\_10697875;
- 385 • rabbit polyclonal C-term KCC2 antibody, Millipore #07-432, RRID AB\_310611;

386 • mouse monoclonal pS940 KCC2, Phosphosolutions #p1551-940, RRID AB\_2492213;  
387 • chicken polyclonal N-term KCC2b antibody (Markkanen et al., 2014);  
388 • IgG/IgY control antibodies

389 Following antibody binding, 20 mM DMP (dimethyl pimelimidate, ThermoFisher 21667) in cold 1X PBS  
390 was used to crosslink antibodies with the beads, according to manufacturer's instructions. The  
391 crosslinking reaction was stopped by adding 50 mM Tris-HCl to quench excess DMP, and the antibody-  
392 conjugated beads were thoroughly washed with the IP buffer. 1-10 mg of pre-cleared mouse brain  
393 membrane fractions were incubated with KCC2 or control antibody-conjugated beads on a rotating  
394 platform for 4 hours at 4 °C. After co-immunoprecipitation, the appropriate unbound fraction was saved for  
395 comparison with an equal amount of lysate to calculate the IP-efficiency (**Figure 2 – Figure Supplement**  
396 **1**). The beads were washed twice with IP buffer containing detergent, and twice with IP-buffer excluding  
397 the detergent. The last wash was performed in 50 mM ammonium bicarbonate. Co-immunoprecipitation  
398 experiments for validating KCC2 and PACSIN1 was performed similar to the above procedure, in the  
399 absence of DMP-crosslinking. In a subset of validation experiments, anti-PACSIN1 antibody (Synaptic  
400 Systems #196002, RRID AB\_2161839), was used for reverse co-IP. The break-down of LC/MS replicates  
401 are as follows:

- 402 • Optimization of LC/MS (**Figure 1**) using CHAPS and C<sub>12</sub>E<sub>9</sub>-solubilized membrane fractions were  
403 performed each with parallel IgG. (6XCHAPS KCC2) + (6XCHAPS IgG) + (2XC12E9 KCC2) +  
404 (2XC12E9 IgG) = 16 AP/MS using 5 µg C-terminal pan-KCC2 antibody, and 1mg of P50  
405 membranes.
- 406 • LC/MS (**Figure 2,3**) using C<sub>12</sub>E<sub>9</sub>-solubilized membrane fractions were performed (with parallel  
407 IgG/IgY) as follows: (1XP50, C-term KCC2) + (1XP50, pS940 KCC2) + (1XP50, IgG) + (1XP50,  
408 N-term KCC2) + (1XP50, IgY) + (1XP5, C-term KCC2) + (1XP5, IgG) + (1XP5, N-term KCC2) +  
409 (1XP5, IgY) = 9 AP/MS using 100 µg KCC2 antibody, and 10 mg of membrane.

410

#### 411 **Mass spectrometry**

412 Mass spectrometry for the creation of the KCC2 interactome (**Figure 2, 3**) was performed at the SPARC  
413 Biocentre at SickKids Research Institute (Toronto, Ontario). Mass spectrometry for the determination of

414 optimal detergents for native KCC2 extraction (**Figure 1**) was performed in the lab of Dr. Tony Pawson at  
415 the Lunenfeld-Tanenbaum Research Institute (LTRI), Mount Sinai Hospital (Toronto, ON) and in the  
416 CBTC (University of Toronto). Specific details on the individual experiments performed in each facility is  
417 located in **Figure 2 – Source Data 1**.

418 For all MS experiments, proteins were eluted from beads by treatment with double the bead volume of  
419 0.5 M ammonium hydroxide (pH 11.0), and bead removal by centrifugation; this procedure was repeated  
420 2x. The combined supernatants were dried under vacuum, reduced with DTT, and the free cysteines  
421 were alkylated with iodoacetamide. The protein concentration was measured, and trypsin was added at a  
422 ratio of 1:50; digestion occurred overnight at 37 °C. The peptides were purified by C18 reverse phase  
423 chromatography on a ZipTip (Millipore). Specifics of the MS in the three facilities are below:

424 SPARC: The peptides were analyzed on a linear ion trap-Orbitrap hybrid analyzer (LTQ-Orbitrap,  
425 ThermoFisher, San Jose, CA) outfitted with a nanospray source and EASY-nLC split-free nano-LC  
426 system (ThermoFisher, San Jose, CA). Lyophilized peptide mixtures were dissolved in 0.1% formic acid  
427 and loaded onto a 75 µm x 50 cm PepMax RSLC EASY-Spray column filled with 2 µM C18 beads  
428 (ThermoFisher San, Jose CA) at a pressure of 800 BAR. Peptides were eluted over 60 min at a rate of  
429 250 nl/min using a 0 to 35% acetonitrile gradient in 0.1% formic acid. Peptides were introduced by nano  
430 electrospray into an LTQ-Orbitrap hybrid mass spectrometer (Thermo-Fisher). The instrument method  
431 consisted of one MS full scan (400–1500 m/z) in the Orbitrap mass analyzer, an automatic gain control  
432 target of 500,000 with a maximum ion injection of 200 ms, one microscan, and a resolution of 120,000.  
433 Ten data-dependent MS/MS scans were performed in the linear ion trap using the ten most intense ions  
434 at 35% normalized collision energy. The MS and MS/MS scans were obtained in parallel fashion. In  
435 MS/MS mode automatic gain control targets were 10,000 with a maximum ion injection time of 100 ms. A  
436 minimum ion intensity of 1000 was required to trigger an MS/MS spectrum. The dynamic exclusion was  
437 applied using a maximum exclusion list of 500 with one repeat count with a repeat duration of 15 s and  
438 exclusion duration of 45 s.

439 CBTC: Orbitrap analyzer (Q-Exactive, ThermoFisher, San Jose, CA) outfitted with a nanospray source  
440 and EASY-nLC nano-LC system (ThermoFisher, San Jose, CA). Lyophilized peptide mixtures were  
441 dissolved in 0.1% formic acid and loaded onto a 75µm x 50cm PepMax RSLC EASY-Spray column filled

442 with 2 $\mu$ M C18 beads (ThermoFisher San, Jose CA) at a pressure of 800 Bar. Peptides were eluted over  
443 60 min at a rate of 250nl/min using a 0 to 35% acetonitrile gradient in 0.1% formic acid. Peptides were  
444 introduced by nanoelectrospray into the Q-Exactive mass spectrometer (Thermo-Fisher). The instrument  
445 method consisted of one MS full scan (400–1500 m/z) in the Orbitrap mass analyzer with an automatic  
446 gain control target of 1e6, maximum ion injection time of 120 ms and a resolution of 70,000 followed by  
447 10 data dependent MS/MS scans with a resolution of 17,500, an AGC target of 1e6, maximum ion time of  
448 120ms, and one microscan. The intensity threshold to trigger a MS/MS scan was set to 1.7e4.  
449 Fragmentation occurred in the HCD trap with normalized collision energy set to 27. The dynamic  
450 exclusion was applied using a setting of 10 seconds.

451 LTRI: Nano-LCMS using a home-packed 0.75  $\mu$ m x 10cm C18 emitter tip (Reprosil-Pur 120 C18-AQ, 3  
452  $\mu$ m). A Nano LC-Ultra HPLC system (Eksigent) was coupled to an LTQ Orbitrap Elite (ThermoFisher) and  
453 samples were analyzed in data-dependent acquisition mode. A 60000 resolution MS scan was followed  
454 by 10 CID MS/MS ion trap scans on multiply charged precursor ions with a dynamic exclusion of 20  
455 seconds. The LC gradient was delivered at 200nl/minute and consisted of a ramp of 2-35% acetonitrile  
456 (0.1% formic acid) over 90minutes, 35-80% acetonitrile (0.1% formic acid) over 5 minutes, 80%  
457 acetonitrile (0.1% formic acid) for 5 minutes, and then 2% acetonitrile for 20 minutes.

458

#### 459 **Analysis of mass spectra and protein identification**

460 All MS/MS samples were analyzed using Sequest (Thermo Fisher Scientific, San Jose, CA, USA; version  
461 1.4.0.288) and X! Tandem (The GPM, thegpm.org; version CYCLONE (2010.12.01.1)). Sequest was set  
462 up to search Uniprot-mus+musculus\_reviewed\_Oct172015.fasta (unknown version, 25231 entries)  
463 assuming the digestion enzyme trypsin. X! Tandem was set up to search the Uniprot-  
464 mus+musculus\_reviewed\_Oct172015 database (unknown version, 25248 entries) also assuming trypsin.  
465 Sequest and X! Tandem were searched with a fragment ion mass tolerance of 0.020 Da and a parent ion  
466 tolerance of 10.0 PPM. Carbamidomethyl of cysteine was specified in Sequest and X! Tandem as a fixed  
467 modification. Deamidated of asparagine and glutamine and oxidation of methionine were specified in  
468 Sequest as variable modifications. Glu->pyro-Glu of the n-terminus, ammonia-loss of the n-terminus, gln-

469 >pyro-Glu of the n-terminus, deamidated of asparagine and glutamine and oxidation of methionine were  
470 specified in X! Tandem as variable modifications.

471 Scaffold (version Scaffold\_4.7.2, Proteome Software Inc., Portland, OR) was used to validate MS/MS  
472 based peptide and protein identifications. Peptide identifications were accepted if they could be  
473 established at greater than 95.0% probability. Peptide Probabilities from X! Tandem were assigned by the  
474 Peptide Prophet algorithm (Keller et al., 2002) with Scaffold delta-mass correction. Peptide probabilities  
475 from Sequest were assigned by the Scaffold Local FDR algorithm. Protein identifications were accepted if  
476 they could be established at greater than 95.0% probability and contained at least 1 identified peptide.  
477 Protein probabilities were assigned by the Protein Prophet algorithm (Nesvizhskii et al., 2003). Proteins  
478 that contained similar peptides and could not be differentiated based on MS/MS analysis alone were  
479 grouped to satisfy the principles of parsimony. Proteins were annotated with GO terms from  
480 gene\_association.goa\_uniprot (downloaded Dec 14, 2015) (Ashburner et al., 2000). In addition, peak lists  
481 obtained from MS/MS spectra were identified independently using OMSSA version 2.1.9 (Geer et al.,  
482 2004), X!Tandem version X! Tandem Sledgehammer (2013.09.01.1) (Craig and Beavis, 2004),  
483 Andromeda version 1.5.3.4 (Cox et al., 2011), MS Amanda version 1.0.0.5242 (Dorfer et al., 2014), MS-  
484 GF+ version Beta (v10282) (Kim and Pevzner, 2014), Comet version 2015.02 rev. 3 (Eng et al., 2013),  
485 MyriMatch version 2.2.140 (Tabb et al., 2007) and Tide (Diament and Noble, 2011). The search was  
486 conducted using SearchGUI version 2.2.2 (Vaudel et al., 2011).

487 Protein identification was conducted against a concatenated target/decoy version (Elias and Gygi,  
488 2010) of the *Mus musculus* (24797, >99.9%), *Sus scrofa* (1, <0.1%) complement of the UniProtKB  
489 (Apweiler et al., 2004) (version of December 2015, 24798, *Mus Musculus*) canonical and isoform  
490 sequences). The decoy sequences were created by reversing the target sequences in SearchGUI. The  
491 identification settings were as follows: Trypsin with a maximum of 2 missed cleavages; 10.0 ppm as MS1  
492 and 0.5 Da as MS2 tolerances; fixed modifications: Carbamidomethylation of C (+57.021464 Da), variable  
493 modifications: Deamidation of N (+0.984016 Da), Deamidation of Q (+0.984016 Da), Oxidation of M  
494 (+15.994915 Da), Pyrolydione from E (--18.010565 Da), Pyrolydione from Q (--17.026549 Da), Pyrolydione  
495 from carbamidomethylated C (--17.026549 Da) and Acetylation of protein N-term (+42.010565 Da), fixed  
496 modifications during refinement procedure: Carbamidomethylation of C (+57.021464 Da).

497 Peptides and proteins were inferred from the spectrum identification results using PeptideShaker  
498 version 1.9.0 (Vaudel et al., 2015). Peptide Spectrum Matches (PSMs), peptides and proteins were  
499 validated at a 1.0% False Discovery Rate (FDR) estimated using the decoy-hit distribution. Spectrum  
500 counting abundance indexes were estimated using the Normalized Spectrum Abundance Factor (Powell  
501 et al., 2004) adapted for better handling of protein inference issues and peptide detectability. While the  
502 two independent protein algorithm searches largely matched with each other, a small subset of proteins  
503 were identified with high confidence using the SearchGUI/Peptideshaker platforms that were not identified  
504 with the ThermoFisher Scientific/Scaffold platforms.

505 The mass spectrometry data along with the identification results have been deposited to the  
506 ProteomeXchange Consortium (Vizcaíno et al., 2014) via the PRIDE partner repository (Martens et al.,  
507 2005) with the dataset identifier 466 PXD006046. During the review process this data can be accessed at  
508 <https://www.ebi.ac.uk/pride/archive/> with the following information:

509 Username: reviewer62454@ebi.ac.uk

510 Password: E0IS1QTW

### 511 **Dataset Filtering**

512 Protein candidates from both pilot and primary LC/MS screens were subject to the following stringent  
513 criteria to build the KCC2 interactome. First pass filter grouping: at least 2 unique peptides and fold  
514 change of total spectra above 1.5. Second pass filter grouping: for proteins with only 1 unique peptide,  
515 consider whether (a) the protein isoform is an already validated KCC2 interactor in literature; (b) the  
516 protein isoform already appears in the first pass filter; (c) the protein isoform appears as a single-peptide  
517 interactor across experiments (using the same epitope KCC2 IPs / different epitope KCC2 IPs / different  
518 developmental time KCC2 IPs). If a particular protein isoform matches any of the above criteria, it gets  
519 shifted to the first pass filter grouping. Finally, the proteins that appear in the KCC2 interactome that are  
520 previously identified spurious interactors as identified in the CRAPome database (Mellacheruvu et al.,  
521 2013) were further eliminated. For the existing proteins a MaxP-SAINT score (Choi et al., 2012) was  
522 assigned and proteins were grouped as Gold, Silver or Bronze interactors prior to subsequent PPI  
523 (protein-protein interaction) network analysis. See **Figure 3 – Figure Supplement 3** for a detailed  
524 description of the path towards constructing the KCC2 interactome.

525

### 526 **Integrated PPI network analysis**

527 Protein interactions were integrated with curated, high-throughput and predicted interactions from I2D ver.  
528 2.3 database (Brown and Jurisica, 2007), FpClass high-confidence predictions (Kotlyar et al., 2014) and  
529 from the BioGRID database (Stark et al., 2006). Networks were visualized using Cytoscape ver. 3.3.0  
530 (Shannon et al., 2003; Cline et al., 2007). Components of the KCC2 interactome were mapped to the  
531 excitatory synapse-enriched PSD proteome (Collins et al., 2006), or the inhibitory synapse-enriched  
532 GABA<sub>A</sub>R / GABA<sub>B</sub>R / NLGN2 / GlyR proteomes (Heller et al., 2012; Del Pino et al., 2014; Kang et al.,  
533 2014; Nakamura et al., 2016; Schwenk et al., 2016; Uezu et al., 2016).

534

### 535 **In vitro co-immunoprecipitation**

536 HEK-293 and COS7 cells obtained from the ATCC were authenticated and checked for mycoplasma  
537 contamination. For co-immunoprecipitation experiments, cells were transfected with KCC2b-MYC, eGFP  
538 control, eGFP-PACSIN1/2/3, or eGFP-PACSIN1-deletion constructs (0.25 µg/construct) using  
539 Lipofectamine (Invitrogen) at 70% confluency. Thirty-six hours after transfection, cells were washed with  
540 ice-cold 1× PBS and lysed in modified RIPA buffer [50 mM Tris-HCl, pH 7.4, 150 mM NaCl, 1 mM EDTA,  
541 1% Nonidet P-40, 0.1% SDS, 0.5% DOC, and protease inhibitors (Roche)]. Lysed cells were incubated  
542 on ice for 30 min and were centrifuged at 15,000 × g for 15 min at 4 °C. Cell lysates or solubilized  
543 membrane fractions (~0.2 – 0.5mg protein) were incubated with N-terminal KCC2b or anti-myc (CST  
544 #9B11, RRID AB\_331783) antibodies on a rotating platform (4 h, 4 °C). Lysates were subsequently  
545 incubated with 20µl GammaBind IgG beads (GE Healthcare) on a rotating platform (1 h at 4 °C). After  
546 incubation, beads were washed twice with modified RIPA buffer, and twice with modified RIPA buffer  
547 minus detergents. Bound proteins were eluted with SDS sample buffer and subjected to SDS/PAGE  
548 along with 10% of input fraction and immunoblotted. **Figure 5e** is representative of 4 independent  
549 biological replicates; **Figure 5f** is representative of 3 independent biological replicates.

550

### 551 **BN-PAGE analysis and antibody-shift assay**



552 Native-membrane fractions were prepared similarly as described (Swamy et al., 2006; Schwenk et al.,  
553 2012; Mahadevan et al., 2014, 2015). Antibody-shift assay and 2D BN-PAGE analysis of native-KCC2  
554 complexes were performed as described previously (Mahadevan et al., 2014, 2015). Briefly, 50µg - 100µg  
555 of C<sub>12</sub>E<sub>9</sub> solubilized complexes were pre-incubated for 1 hour with 10 µg of anti-N-terminal KCC2b  
556 antibody or chicken IgY whole molecule, prior to the addition of Coomassie blue G250. 1D-BN-PAGE was  
557 performed as described above using home-made 4% and 5% bis-tris gels as described (Swamy et al.,  
558 2006). After the completion of the gel run, excised BN- PAGE lanes were equilibrated in Laemmli buffer  
559 containing SDS and DTT for 15 minutes at room temperature to denature the native proteins. After a brief  
560 rinse in SDS- PAGE running buffer, the excised BN-PAGE lanes were placed on a 6% or 8% SDS- PAGE  
561 gel for separation in the second dimension. After standard electro-blotting of SDS- PAGE-resolved  
562 samples on nitrocellulose membrane, the blot was cut into two molecular weight ranges; the top blots  
563 were subjected to western blotting analysis with Rb anti- KCC2, and the bottom blots with Rb anti-  
564 PACSIN1. Antibody-shift experiments (**Figure 5d**) using hippocampal membranes are representative  
565 from 2 independent biological replicates.

566

#### 567 **PACSIN overexpression and shRNA constructs**

568 All PACSIN constructs used for overexpression and shRNA constructs have been previously validated for  
569 specificity (Anggono et al., 2013; Widagdo et al., 2016). The PACSIN1 shRNA-targeting sequence (sh#1,  
570 5'-GCGCCAGCTCATCGAGAAA-3') or control shRNA sequence was inserted into the pSuper vector  
571 system (Oligoengine) as described previously (Anggono et al., 2013). The efficiency and specificity of the  
572 PACSIN1 and control shRNA constructs were tested in HEK 293T cells overexpressing GFP-PACSIN1,  
573 and they were subsequently cloned into pAAV-U6 for lentiviral production (serotype AAV2/9).

574

#### 575 **Hippocampal cultures and electrophysiology**

576 Low-density cultures of dissociated mouse hippocampal neurons were prepared as previously described  
577 (Acton et al., 2012; Mahadevan et al., 2014). Experiments were performed after 10-13 days in culture  
578 (DIC). Electrophysiological recordings were performed using pipettes made from glass capillaries (WPI),  
579 as previously described (Acton et al., 2012; Mahadevan et al., 2014). For Cl<sup>-</sup> loading experiments in

580 whole-cell configuration, pipettes (5–7 M $\Omega$ ) were filled with an internal solution containing: 90 mM K<sup>+</sup>-  
581 gluconate, 30 mM KCl, 10 mM HEPES, 0.2 mM EGTA, 4 mM ATP, 0.3 mM GTP, and 10 mM  
582 phosphocreatine (pH 7.4, 300 mOsm). For gramicidin perforated recordings, pipettes with a resistance of  
583 7–12 M $\Omega$  were filled with an internal solution containing 150 mM KCl, 10 mM HEPES, and 50 $\mu$ g/ml  
584 gramicidin (pH 7.4, 300 mOsm). Cultured neurons were continuously perfused with standard extracellular  
585 solution. Cultured neurons were selected for electrophysiology based on the following criteria: (1) with a  
586 healthy oval or pyramidal-shaped cell body; (2) multiple clearly identifiable processes; (3) a cell body and  
587 proximal dendrites that were relatively isolated; (4) reporter fluorescence (if applicable). Recordings  
588 started when the series resistance dropped below 50 M $\Omega$ . IV-curves were made by depolarizing the  
589 membrane potential in steps, while simultaneously stimulating GABAergic transmission. A 20 $\mu$ M GABA  
590 puff was applied to the soma. A linear regression of the IPSC/P amplitude was used to calculate the  
591 voltage dependence of IPSC/Ps; the intercept of this line with the abscissa was taken as E<sub>GABA</sub>, and the  
592 slope of this line was taken as the synaptic conductance. The maximum current amplitude was taken as  
593 the largest absolute current recorded during the recordings performed for the E<sub>GABA</sub> measurement.  
594 Electrophysiological values have not been corrected for the liquid junction potential of ~7 mV.

595

#### 596 **Fixed immunostaining and confocal microscopy**

597 DIV 12-14 cultured hippocampal neurons with were first rinsed with 1X PBS, and fixed in 4%  
598 paraformaldehyde for 10 min on ice followed by washing thrice with 1X PBS. Neurons were then  
599 permeabilized with 1X PBS containing 10% goat serum and 0.5% Triton X-100 for 30 minutes, followed  
600 by a 45 minute incubation with rabbit anti-KCC2 (Millipore 07-432) antibodies at 37 °C to detect  
601 endogenous proteins. Finally, neurons were washed thrice with 1X PBS and incubated with Alexa-fluor  
602 555-conjugated goat anti-rabbit antibody for 45 minutes at 37°C. Neurons were imaged on a Leica TCS  
603 SP8 confocal system with a Leica DMI 6000 inverted microscope (Quorum Technologies). Cultured  
604 neurons were selected for immunostaining based on the following criteria: (1) with a healthy oval or  
605 pyramidal-shaped cell body; (2) multiple clearly identifiable processes; (3) a cell body and proximal  
606 dendrites that were relatively isolated; (4) reporter fluorescence (if applicable). Images were acquired

607 using 3D Image Analysis software (Perkin Elmer). Images were obtained using a 63x 1.4-NA oil  
608 immersion objective. Imaging experiments were performed and analyzed in a blinded manner.

609

## 610 **Statistics**

611 For electrophysiology and immunostaining data (**Figure 6**), 'n' values report the number of neurons, and  
612 were obtained from a minimum of three independent sets of cultured neurons (produced from different  
613 litters). Example recordings in **Figure 6a** are representative of n=9 (shRNA control) and n=11 (PACSIN1  
614 shRNA). Example recordings in **Figure 6e** are representative of n=32 (shRNA control) and n=32  
615 (PACSIN1 shRNA). Example recordings in **Figure 6f** are representative of n=23 (eGFP) and n=16  
616 (PACSIN1-eGFP). Data in **Figure 6 b, c, e and f** are mean  $\pm$  SEM. Statistical significance was  
617 determined using either SigmaStat or GraphPad Prism (version 5.01) software. Statistical significance in  
618 **Figure 6 b, c, d, e and f** was determined using Student's t-tests (two-tailed); all data sets passed the  
619 normal distribution assumptions test. Statistical significance is noted as follows: \* p < 0.05, \*\* p < 0.01, \*\*\*  
620 p < 0.001. Exact p and t values are reported in the Results text.

621 **Figure 1a, 5b, 5c, 5d** are representative of two independent biological replicates. **Figure 5f** is  
622 representative of three independent biological replicates. **Figure 5e** is representative of four independent  
623 biological replicates.

## ACKNOWLEDGEMENTS

We thank the following persons for technical assistance with LC/MS: Dr. Suzanne Ackloo at the Centre for Biological Timing and Cognition, University of Toronto; Drs. Paul Taylor and Jonathan Krieger, at the SPARC BioCentre, Hospital for Sick Children. We thank Drs. Harald Barsnes and Marc Vaudel, University of Bergen, for assistance with the PeptideShaker / CompOmics application. This study was funded by the following: Simons Foundation Autism Research Initiative to M.W. and Y.D.K.; CIHR training grant from the Sleep and Biological Rhythms Training Program, Toronto to V.M; The Academy of Finland grants to P.U. and M.S.A; The John T. Reid Charitable Trusts and Australian Research Council (ARC) project grant (DP170102402) to V.A.; CIHR foundation grant FRN-133431 to A.E; CIHR Operating Grant to M.W.

## COMPETING FINANCIAL INTERESTS

The authors declare no competing financial interests.

## REFERENCES

- Acton BA, Mahadevan V, Mercado A, Uvarov P, Ding Y, Pressey J, Airaksinen MS, Mount DB, Woodin M a. (2012) Hyperpolarizing GABAergic Transmission Requires the KCC2 C-Terminal ISO Domain. *J Neurosci* 32:8746–8751.
- Anggono V, Koç-Schmitz Y, Widagdo J, Kormann J, Quan A, Chen C-M, Robinson PJ, Choi S-Y, Linden DJ, Plomann M, Huganir RL (2013) PICK1 interacts with PACSIN to regulate AMPA receptor internalization and cerebellar long-term depression. *Proc Natl Acad Sci U S A* 110:13976–13981
- Anggono V, Smillie KJ, Graham ME, Valova VA, Cousin MA, Robinson PJ (2006) Syndapin I is the phosphorylation-regulated dynamin I partner in synaptic vesicle endocytosis. *Nat Neurosci* 9:752–760.
- Apweiler R, Bairoch A, Wu CH, Barker WC, Boeckmann B, Ferro S, Gasteiger E, Huang H, Lopez R, Magrane M, Martin MJ, Natale DA, O'Donovan C, Redaschi N, Yeh L-SL (2004) UniProt: the Universal Protein knowledgebase. *Nucleic Acids Res* 32:D115-9.
- Ashburner M et al. (2000) Gene ontology: tool for the unification of biology. The Gene Ontology Consortium. *Nat Genet* 5:25–29.
- Babu M, Greenblatt JF, Emili A, Strynadka NCJ, Reithmeier RAF, Moraes TF (2010) Structure of a SLC26 anion transporter STAS domain in complex with acyl carrier protein: implications for E. coli YchM in fatty acid metabolism. *Structure* 18:1450–1462.
- Bacaj T, Ahmad M, Jurado S, Malenka RC, Südhof TC (2015) Synaptic Function of Rab11Fip5: Selective Requirement for Hippocampal Long-Term Depression. *J Neurosci* 35:7460–7474
- Banerjee A, Rikhye R V., Breton-Provencher V, Tang X, Li C, Li K, Runyan CA, Fu Z, Jaenisch R, Sur M (2016) Jointly reduced inhibition and excitation underlies circuit-wide changes in cortical processing

- in Rett syndrome. *Proc Natl Acad Sci* 113:E7287–E7296
- Ben-Ari Y (2002) Excitatory actions of gaba during development: the nature of the nurture. *Nat Rev Neurosci* 3:728–739
- Berkefeld H, Sailer CA, Bildl W, Rohde V, Thumfart J-O, Eble S, Klugbauer N, Reisinger E, Bischofberger J, Oliver D, Knaus H-G, Schulte U, Fakler B (2006) BKCa-Cav channel complexes mediate rapid and localized Ca<sup>2+</sup>-activated K<sup>+</sup> signaling. *Science* 314:615–620.
- Blaesse P, Airaksinen MS, Rivera C, Kaila K (2009) Cation-chloride cotransporters and neuronal function. *Neuron* 61:820–838
- Blaesse P, Guillemain I, Schindler J, Schweizer M, Delpire E, Khiroug L, Friauf E, Nothwang HG (2006) Oligomerization of KCC2 correlates with development of inhibitory neurotransmission. *J Neurosci* 26:10407–10419
- Blaesse P, Schmidt T (2014) K-Cl cotransporter KCC2—a moonlighting protein in excitatory and inhibitory synapse development and function. *Pflugers Arch*
- Brown KR, Jurisica I (2007) Unequal evolutionary conservation of human protein interactions in interologous networks. *Genome Biol* 8:R95.
- Carroll RC, Beattie EC, Xia H, Lüscher C, Altschuler Y, Nicoll RA, Malenka RC, von Zastrow M (1999) Dynamin-dependent endocytosis of ionotropic glutamate receptors. *Proc Natl Acad Sci U S A* 96:14112–14117.
- Cellot G, Cherubini E (2014) GABAergic signaling as therapeutic target for autism spectrum disorders. *Front Pediatr* 2:70
- Cembrowski MS, Wang L, Sugino K, Shields BC, Spruston N (2016) Hipposeq: a comprehensive RNA-seq database of gene expression in hippocampal principal neurons. *Elife* 5:e14997.
- César-Razquin A, Snijder B, Frappier-Brinton T, Isserlin R, Gyimesi G, Bai X, Reithmeier RA, Hepworth D, Hediger MA, Edwards AM, Superti-Furga G (2015) A Call for Systematic Research on Solute Carriers. *Cell* 162:478–487
- Chamma I, Chevy Q, Poncer JC, Lévi S (2012) Role of the neuronal K-Cl co-transporter KCC2 in inhibitory and excitatory neurotransmission. *Front Cell Neurosci* 6:5
- Chamma I, Heubl M, Chevy Q, Renner M, Moutkine I, Eugène E, Poncer JC, Lévi S (2013) Activity-dependent regulation of the K/Cl transporter KCC2 membrane diffusion, clustering, and function in hippocampal neurons. *J Neurosci* 33:15488–15503.
- Chevy Q, Heubl M, Goutierre M, Backer S, Moutkine I, Eugène E, Bloch-Gallego E, Lévi S, Poncer JC (2015) KCC2 Gates Activity-Driven AMPA Receptor Traffic through Cofilin Phosphorylation. *J Neurosci* 35:15772–15786
- Chiu CQ, Lur G, Morse TM, Carnevale NT, Ellis-Davies GCR, Higley MJ (2013) Compartmentalization of GABAergic inhibition by dendritic spines. *Science* 340:759–762
- Choi H, Liu G, Mellacheruvu D, Tyers M, Gingras A-C, Nesvizhskii AI (2012) Analyzing protein-protein interactions from affinity purification-mass spectrometry data with SAINT. *Curr Protoc Bioinforma* Chapter 8:Unit8.15.
- Clayton EL, Anggono V, Smillie KJ, Chau N, Robinson PJ, Cousin MA (2009) The Phospho-Dependent Dynamin-Syndapin Interaction Triggers Activity-Dependent Bulk Endocytosis of Synaptic Vesicles. *J Neurosci* 29:7706–7717.
- Cline MS et al. (2007) Integration of biological networks and gene expression data using Cytoscape. *Nat Protoc* 2:2366–2382.

- Collins MO, Husi H, Yu L, Brandon JM, Anderson CNG, Blackstock WP, Choudhary JS, Grant SGN (2006) Molecular characterization and comparison of the components and multiprotein complexes in the postsynaptic proteome. *J Neurochem* 97 Suppl 1:16–23
- Coull JAM, Boudreau D, Bachand K, Prescott S a, Nault F, Sik A, De Koninck P, De Koninck Y (2003) Trans-synaptic shift in anion gradient in spinal lamina I neurons as a mechanism of neuropathic pain. *Nature* 424:938–942.
- Cox J, Neuhauser N, Michalski A, Scheltema RA, Olsen J V, Mann M (2011) Andromeda: a peptide search engine integrated into the MaxQuant environment. *J Proteome Res* 10:1794–1805.
- Craig R, Beavis RC (2004) TANDEM: matching proteins with tandem mass spectra. *Bioinformatics* 20:1466–1467.
- Del Pino I, Koch D, Schemm R, Qualmann B, Betz H, Paarmann I (2014) Proteomic analysis of glycine receptor  $\beta$  subunit (GlyR $\beta$ )-interacting proteins: evidence for syndapin I regulating synaptic glycine receptors. *J Biol Chem* 289:11396–11409.
- Diament BJ, Noble WS (2011) Faster SEQUEST searching for peptide identification from tandem mass spectra. *J Proteome Res* 10:3871–3879.
- Dorfer V, Pichler P, Stranzl T, Stadlmann J, Taus T, Winkler S, Mechtler K (2014) MS Amanda, a universal identification algorithm optimized for high accuracy tandem mass spectra. *J Proteome Res* 13:3679–3684.
- Doyon N, Vinay L, Prescott SA, De Koninck Y (2016) Chloride Regulation: A Dynamic Equilibrium Crucial for Synaptic Inhibition. *Neuron* 89:1157–1172.
- Elias JE, Gygi SP (2010) Target-decoy search strategy for mass spectrometry-based proteomics. *Methods Mol Biol* 604:55–71.
- Eng JK, Jahan TA, Hoopmann MR (2013) Comet: an open-source MS/MS sequence database search tool. *Proteomics* 13:22–24.
- Fiumelli H, Briner A, Puskarjov M, Blaesse P, Belem BJ, Dayer AG, Kaila K, Martin JL, Vutskits L (2013) An ion transport-independent role for the cation-chloride cotransporter kcc2 in dendritic spinogenesis in vivo. *Cereb Cortex* 23:378–388.
- Ford A, Castonguay XA, Cottet XM, Little JW, Chen Z, Symons-liguori XAM, Doyle T, Egan TM, Vanderah TW, Konnick Y De, Tosh DK, Jacobson XK a, Salvemini D (2015) Engagement of the GABA to KCC2 Signaling Pathway Contributes to the Analgesic Effects of A3AR Agonists in Neuropathic Pain. *J Neurosci* 35:6057–6067.
- Friedel P, Kahle KT, Zhang J, Hertz N, Pisella LI, Buhler E, Schaller F, Duan J, Khanna AR, Bishop PN, Shokat KM, Medina I (2015) WNK1-regulated inhibitory phosphorylation of the KCC2 cotransporter maintains the depolarizing action of GABA in immature neurons. *Sci Signal* 8:ra65.
- Garbarini N, Delpire E (2008) The RCC1 domain of protein associated with Myc (PAM) interacts with and regulates KCC2. *Cell Physiol Biochem* 22:31–44
- Gauvain G, Chamma I, Chevy Q, Cabezas C, Irinopoulou T, Bodrug N, Carnaud M, Lévi S, Poncer JC (2011) The neuronal K-Cl cotransporter KCC2 influences postsynaptic AMPA receptor content and lateral diffusion in dendritic spines. *Proc Natl Acad Sci U S A* 108:15474–15479
- Geer LY, Markey SP, Kowalak JA, Wagner L, Xu M, Maynard DM, Yang X, Shi W, Bryant SH (2004) Open mass spectrometry search algorithm. *J Proteome Res* 3:958–964.
- Gulyas AI, Sik A, Payne JA, Kaila K, Freund TF, Gulya AI (2001) The KCl cotransporter, KCC2, is highly expressed in the vicinity of excitatory synapses in the rat hippocampus. *Eur J Neurosci* 13:2205–2217

- Heller EA, Zhang W, Selimi F, Earnheart JC, Ślimak MA, Santos-Torres J, Ibañez-Tallon I, Aoki C, Chait BT, Heintz N (2012) The biochemical anatomy of cortical inhibitory synapses Nitabach MN, ed. PLoS One 7:e39572.
- Higley MJ (2014) Localized GABAergic inhibition of dendritic Ca<sup>2+</sup> signalling. Nat Rev Neurosci 15:567–572
- Horn Z, Ringstedt T, Blaesse P, Kaila K, Herlenius E (2010) Premature expression of KCC2 in embryonic mice perturbs neural development by an ion transport-independent mechanism. Eur J Neurosci 31:2142–2155
- Huberfeld G, Wittner L, Clemenceau S, Baulac M, Kaila K, Miles R, Rivera C (2007) Perturbed chloride homeostasis and GABAergic signaling in human temporal lobe epilepsy. J Neurosci 27:9866–9873
- Husi H, Ward MA, Choudhary JS, Blackstock WP, Grant SG (2000) Proteomic analysis of NMDA receptor-adhesion protein signaling complexes. Nat Neurosci 3:661–669
- Ikeda K, Onimaru H, Yamada J, Inoue K, Ueno S, Onaka T, Toyoda H, Arata A, Ishikawa T, Taketo MM, Fukuda A, Kawakami K (2004) Malfunction of respiratory-related neuronal activity in Na<sup>+</sup>, K<sup>+</sup>-ATPase alpha2 subunit-deficient mice is attributable to abnormal Cl<sup>-</sup> homeostasis in brainstem neurons. J Neurosci 24:10693–10701
- Inoue K, Ueno S, Fukuda A (2004) Interaction of neuron-specific K<sup>+</sup>-Cl<sup>-</sup> cotransporter, KCC2, with brain-type creatine kinase. FEBS Lett 564:131–135.
- Inoue K, Yamada J, Ueno S, Fukuda A (2006) Brain-type creatine kinase activates neuron-specific K<sup>+</sup>-Cl<sup>-</sup> co-transporter KCC2. J Neurochem 96:598–608.
- Ivakine EA, Acton BA, Mahadevan V, Ormond J, Tang M, Pressey JC, Huang MY, Ng D, Delpire E, Salter MW, Woodin MA, McInnes RR (2013) Neto2 is a KCC2 interacting protein required for neuronal Cl<sup>-</sup> regulation in hippocampal neurons. Proc Natl Acad Sci U S A 110:3561–3566
- Kahle KKT, Deeb TTZ, Puskarjov M, Silayeva L, Liang B, Kaila K, Moss SJ (2013) Modulation of neuronal activity by phosphorylation of the K-Cl cotransporter KCC2. Trends Neurosci 36:726–737.
- Kahle KT et al. (2014) Genetically encoded impairment of neuronal KCC2 cotransporter function in human idiopathic generalized epilepsy. EMBO Rep 15:766–774
- Kahle KT, Staley KJ, Nahed B V, Gamba G, Hebert SC, Lifton RP, Mount DB (2008) Roles of the cation-chloride cotransporters in neurological disease. Nat Clin Pract Neurol 4:490–503
- Kaila K, Price T, Payne J, Puskarjov M, Voipio J (2014) Cation-chloride cotransporters in neuronal development, plasticity and disease. Nat Rev Neurosci 15:637–654
- Kang Y, Ge Y, Cassidy RM, Lam V, Luo L, Moon K-M, Lewis R, Molday RS, Wong ROL, Foster LJ, Craig AM (2014) A combined transgenic proteomic analysis and regulated trafficking of neuroligin-2. J Biol Chem 289:29350–29364.
- Keller A, Nesvizhskii A, Kolker E, Aebersold R (2002) Empirical statistical model to estimate the accuracy of peptide identifications made by MS/MS and database search. Anal Chem 74:5383–5392.
- Kessels MM, Qualmann B (2004) The syndapin protein family: linking membrane trafficking with the cytoskeleton. J Cell Sci 117:3077–3086.
- Kessels MM, Qualmann B (2006) Syndapin Oligomers Interconnect the Machineries for Endocytic Vesicle Formation and Actin Polymerization. J Biol Chem 281:13285–13299.
- Kessels MM, Qualmann B (2015) Different functional modes of BAR domain proteins in formation and plasticity of mammalian postsynapses. J Cell Sci:1–9.
- Kim S, Pevzner PA (2014) MS-GF+ makes progress towards a universal database search tool for

- proteomics. *Nat Commun* 5:5277.
- Kotlyar M, Pastrello C, Pivetta F, Lo Sardo A, Cumbaa C, Li H, Naranian T, Niu Y, Ding Z, Vafaei F, Broackes-Carter F, Petschnigg J, Mills GB, Jurisicova A, Stagljar I, Maestro R, Jurisica I (2014) In silico prediction of physical protein interactions and characterization of interactome orphans. *Nat Methods* 12:79–84
- Lee HHC, Deeb TZ, Walker JA, Davies PA, Moss SJ (2011) NMDA receptor activity downregulates KCC2 resulting in depolarizing GABAA receptor-mediated currents. *Nat Neurosci* 14:736–743
- Lee HHC, Walker JA, Williams JR, Goodier RJ, Payne JA, Moss SJ (2007) Direct protein kinase C-dependent phosphorylation regulates the cell surface stability and activity of the potassium chloride cotransporter KCC2. *J Biol Chem* 282:29777–29784
- Lee SH, Liu L, Wang YT, Sheng M (2002) Clathrin adaptor AP2 and NSF interact with overlapping sites of GluR2 and play distinct roles in AMPA receptor trafficking and hippocampal LTD. *Neuron* 36:661–674.
- Leonzino M, Busnelli M, Antonucci F, Verderio C, Mazzanti M, Chini B (2016) The Timing of the Excitatory-to-Inhibitory GABA Switch Is Regulated by the Oxytocin Receptor via KCC2. *Cell Rep* 15.
- Li H, Khirug S, Cai C, Ludwig A, Blaesse P, Kolikova J, Afzalov R, Coleman SK, Lauri S, Airaksinen MS, Keinänen K, Khiroug L, Saarma M, Kaila K, Rivera C (2007) KCC2 interacts with the dendritic cytoskeleton to promote spine development. *Neuron* 56:1019–1033
- Lin L, Yee SW, Kim RB, Giacomini KM (2015) SLC transporters as therapeutic targets: emerging opportunities. *Nat Rev Drug Discov* 14:543–560
- Llano O, Smirnov S, Soni S, Golubtsov A, Guillemin I, Hotulainen P, Medina I, Nothwang HG, Rivera C, Ludwig A, *Neuroscience* (2015) KCC2 regulates actin dynamics in spines via interaction with betaPIX. *J Cell Biol* 209:671–686.
- Mahadevan V, Dargaei Z, Ivakine EA, Hartmann A-M, Ng D, Chevrier J, Ormond J, Nothwang HG, McInnes RR, Woodin MA (2015) Neto2-null mice have impaired GABAergic inhibition and are susceptible to seizures. *Front Cell Neurosci* 9:368
- Mahadevan V, Pressey JC, Acton BA, Uvarov P, Huang MY, Chevrier J, Puchalski A, Li CM, Ivakine EA, Airaksinen MS, Delpire E, McInnes RR, Woodin MA (2014) Kainate Receptors Coexist in a Functional Complex with KCC2 and Regulate Chloride Homeostasis in Hippocampal Neurons. *Cell Rep* 7:1762–1770
- Mahadevan V, Woodin MA (2016) Regulation of neuronal chloride homeostasis by neuromodulators. *J Physiol*
- Markkanen M, Karhunen T, Llano O, Ludwig A, Rivera C, Uvarov P, Airaksinen MS (2014) Distribution of neuronal KCC2a and KCC2b isoforms in mouse CNS. *J Comp Neurol* 522:1897–1914.
- Martens L, Hermjakob H, Jones P, Adamski M, Taylor C, States D, Gevaert K, Vandekerckhove J, Apweiler R (2005) PRIDE: the proteomics identifications database. *Proteomics* 5:3537–3545.
- Medina I, Friedel P, Rivera C, Kahle KT, Kourdougli N, Uvarov P, Pellegrino C (2014) Current view on the functional regulation of the neuronal K(+)-Cl(-) cotransporter KCC2. *Front Cell Neurosci* 8:27
- Mellacheruvu D et al. (2013) The CRAPome: a contaminant repository for affinity purification-mass spectrometry data. *Nat Methods* 10:730–736.
- Modregger J, Ritter B, Witter B, Paulsson M, Plomann M (2000) All three PACSIN isoforms bind to endocytic proteins and inhibit endocytosis. *J Cell Sci* 113:4511–4521.
- Müller CS, Haupt A, Bildl W, Schindler J, Knaus H-G, Meissner M, Rammner B, Striessnig J, Flockerzi V, Fakler B, Schulte U (2010) Quantitative proteomics of the Cav2 channel nano- environments in the



- mammalian brain. *Proc Natl Acad Sci U S A* 107:14950–14957.
- Nakamura Y, Morrow DH, Modgil A, Huyghe D, Deeb TZ, Lumb MJ, Davies PA, Moss SJ (2016) Proteomic characterization of inhibitory synapses using a novel pFluorin-tagged GABAAR  $\alpha 2$  subunit knock-in mouse. *J Biol Chem* 291:12394–12407.
- Nelson SB, Valakh V (2015) Excitatory/Inhibitory Balance and Circuit Homeostasis in Autism Spectrum Disorders. *Neuron* 87:684–698.
- Nesvizhskii A, Keller A, Kolker E, Aebersold R (2003) A statistical model for identifying proteins by tandem mass spectrometry. *Anal Chem* 75:4646–4658.
- Nesvizhskii AI, Aebersold R (2005) Interpretation of shotgun proteomic data: the protein inference problem. *Mol Cell Proteomics* 4:1419–1440.
- Pérez-Otaño I, Luján R, Tavalin SJ, Plomann M, Modregger J, Liu X-B, Jones EG, Heinemann SF, Lo DC, Ehlers MD (2006) Endocytosis and synaptic removal of NR3A-containing NMDA receptors by PACSIN1/syndapin1. *Nat Neurosci* 9:611–621
- Pin J-P, Bettler B (2016) Organization and functions of mGlu and GABAB receptor complexes. *Nature* 540:60–68.
- Powell DW, Weaver CM, Jennings JL, McAfee KJ, He Y, Weil PA, Link AJ (2004) Cluster analysis of mass spectrometry data reveals a novel component of SAGA. *Mol Cell Biol* 24:7249–7259.
- Pressey J, Mahadevan V, Khademullah C, Dargaei Z, Chevrier J, Ye W, Huang M, Chauhan A, Meas S, Uvarov P, Airaksinen M, Woodin M (2017) A Kainate Receptor Subunit Promotes the Recycling of the Neuron-Specific K<sup>+</sup>-Cl<sup>-</sup> Cotransporter KCC2 in Hippocampal Neurons. *J Biol Chem* 292:6190–6201.
- Puskarjov M, Ahmad F, Kaila K, Blaesse P (2012) Activity-Dependent Cleavage of the K-Cl Cotransporter KCC2 Mediated by Calcium-Activated Protease Calpain. *J Neurosci* 32:11356–11364.
- Puskarjov M, Seja P, Heron SE, Williams TC, Ahmad F, Iona X, Oliver KL, Grinton BE, Vutskits L, Scheffer IE, Petrou S, Blaesse P, Dibbens LM, Berkovic SF, Kaila K (2014) A variant of KCC2 from patients with febrile seizures impairs neuronal Cl<sup>-</sup> extrusion and dendritic spine formation. *EMBO Rep* 15:1–7.
- Ramachandran N et al. (2013) VMA21 deficiency prevents vacuolar ATPase assembly and causes autophagic vacuolar myopathy. *Acta Neuropathol* 125:439–457.
- Rivera C, Voipio J, Payne JA, Ruusuvuori E, Lahtinen H, Lamsa K, Pirvola U, Saarma M, Kaila K (1999) The K<sup>+</sup>/Cl<sup>-</sup> co-transporter KCC2 renders GABA hyperpolarizing during neuronal maturation. *Nature* 397:251–255
- Romero F (2009) Solubilization and partial characterization of ouabain-insensitive Na<sup>(+)</sup>-ATPase from basolateral plasma membranes of the intestinal epithelial cells. *Investig clínica* 50:303–314.
- Roussa E, Speer JM, Chudotvorova I, Khakipoor S, Smirnov S, Rivera C, Krieglstein K (2016) K<sup>+</sup>/Cl<sup>-</sup> cotransporter KCC2 membrane trafficking and functionality is regulated by transforming growth factor beta 2. *J Cell Sci* 129:3485–3498.
- Saito H, Watanabe M, Akita T, Ohba C, Sugai K, Ong WP, Shiraishi H, Yuasa S, Matsumoto H, Beng KT, Saitoh S, Miyatake S, Nakashima M, Miyake N, Kato M, Fukuda A, Matsumoto N (2016) Impaired neuronal KCC2 function by biallelic SLC12A5 mutations in migrating focal seizures and severe developmental delay. *Sci Rep* 6:30072.
- Sanz-Clemente A, Matta JA, Isaac JTR, Roche KW (2010) Casein kinase 2 regulates the NR2 subunit composition of synaptic NMDA receptors. *Neuron* 67:984–996.
- Sarkar J, Wakefield S, MacKenzie G, Moss SJ, Maguire J (2011) Neurosteroidogenesis Is Required for

- the Physiological Response to Stress: Role of Neurosteroid-Sensitive GABAA Receptors. *J Neurosci* 31:18198–18210.
- Schulte U, Müller CS, Fakler B (2011) Ion channels and their molecular environments - Glimpses and insights from functional proteomics. *Semin Cell Dev Biol* 22:132–144.
- Schwenk J, Baehrens D, Haupt A, Bildl W, Boudkkazi S, Roeper J, Fakler B, Schulte U (2014) Regional Diversity and Developmental Dynamics of the AMPA-Receptor Proteome in the Mammalian Brain. *Neuron* 84:41–54
- Schwenk J, Harmel N, Brechet A, Zolles G, Berkefeld H, Müller CS, Bildl W, Baehrens D, Hüber B, Kulik A, Klöcker N, Schulte U, Fakler B (2012) High-resolution proteomics unravel architecture and molecular diversity of native AMPA receptor complexes. *Neuron* 74:621–633
- Schwenk J, Metz M, Zolles G, Turecek R, Fritzius T, Bildl W, Tarusawa E, Kulik A, Unger A, Ivankova K, Seddik R, Tiao JY, Rajalu M, Trojanova J, Rohde V, Gassmann M, Schulte U, Fakler B, Bettler B (2010) Native GABA(B) receptors are heteromultimers with a family of auxiliary subunits. *Nature* 465:231–235
- Schwenk J, Pérez-garci E, Schneider A, Kollwe A, Gauthier-kemper A, Fritzius T, Raveh A, Dinamarca MC, Hanuschkin A, Bildl W, Klingauf J, Gassmann M (2016) Modular composition and dynamics of native GABA B receptor complexes identified by high-resolution proteomics. *Nat Neurosci* 19:233–242.
- Selak S, Paternain A V., Aller IM, Picó E, Rivera R, Lerma J (2009) A Role for SNAP25 in Internalization of Kainate Receptors and Synaptic Plasticity. *Neuron* 63:357–371.
- Shannon P, Markiel A, Ozier O, Baliga NS, Wang JT, Ramage D, Amin N, Schwikowski B, Ideker T (2003) Cytoscape: a software environment for integrated models of biomolecular interaction networks. *Genome Res* 13:2498–2504.
- Silayeva L, Deeb TZ, Hines RM, Kelley MR, Munoz MB, Lee HHC, Brandon NJ, Dunlop J, Maguire J, Davies PA, Moss SJ (2015) KCC2 activity is critical in limiting the onset and severity of status epilepticus. *Proc Natl Acad Sci U S A* 112:3523–3528
- Snijder B, Frappier-brinton T, Isserlin R, Gyimesi G, Bai X, Reithmeier RA, Hepworth D, Hediger MA, Edwards AM, Superti-furga G (2015) Perspective A Call for Systematic Research on Solute Carriers. *Cell* 162:478–487.
- Stark C, Breitkreutz B-J, Reguly T, Boucher L, Breitkreutz A, Tyers M (2006) BioGRID: a general repository for interaction datasets. *Nucleic Acids Res* 34:D535-9.
- Stöberg T et al. (2015) Mutations in SLC12A5 in epilepsy of infancy with migrating focal seizures. *Nat Commun* 6:8038.
- Swamy M, Siegers GM, Minguet S, Wollscheid B, Schamel WWA (2006) Blue native polyacrylamide gel electrophoresis (BN-PAGE) for the identification and analysis of multiprotein complexes. *Sci STKE* 2006:pl4
- Tabb DL, Fernando CG, Chambers MC (2007) MyriMatch: highly accurate tandem mass spectral peptide identification by multivariate hypergeometric analysis. *J Proteome Res* 6:654–661.
- Tang X, Kim J, Zhou L, Wengert E, Zhang L, Wu Z, Carromeu C, Muotri AR (2015) KCC2 rescues functional deficits in human neurons derived from patients with Rett syndrome. *Proc Natl Acad Sci* 113:751–756.
- Tang X, Kim J, Zhou L, Wengert E, Zhang L, Wu Z, Carromeu C, Muotri AR, Marchetto MCN, Gage FH, Chen G (2016) KCC2 rescues functional deficits in human neurons derived from patients with Rett syndrome. *Proc Natl Acad Sci U S A* 113:751–756 A
- Tao R, Li C, Newburn EN, Ye T, Lipska BK, Herman MM, Weinberger DR, Kleinman JE, Hyde TM (2012)

- Transcript-specific associations of SLC12A5 (KCC2) in human prefrontal cortex with development, schizophrenia, and affective disorders. *J Neurosci* 32:5216–5222
- Toda T, Ishida K, Kiyama H, Yamashita T, Lee S (2014) Down-Regulation of KCC2 Expression and Phosphorylation in Motoneurons, and Increases the Number of in Primary Afferent Projections to Motoneurons in Mice with Post-Stroke Spasticity. *PLoS One* 9:e114328
- Uezu A, Kanak DJ, Bradshaw TWA, Soderblom EJ, Catavero CM, Burette AC, Weinberg RJ, Soderling SH (2016) Identification of an elaborate complex mediating postsynaptic inhibition. *Science* (80-) 353:1123–1129.
- Uvarov P, Ludwig A, Markkanen M, Pruunsild P, Kaila K, Delpire E, Timmusk T, Rivera C, Airaksinen MS (2007) A novel N-terminal isoform of the neuron-specific K-Cl cotransporter KCC2. *J Biol Chem* 282:30570–30576
- Uvarov P, Ludwig A, Markkanen M, Soni S, Hübner CA, Rivera C, Airaksinen MS (2009) Coexpression and heteromerization of two neuronal K-Cl cotransporter isoforms in neonatal brain. *J Biol Chem* 284:13696–13704
- Vandenberghe W, Nicoll RA, Brecht DS (2005) Stargazin is an AMPA receptor auxiliary subunit. *Proc Natl Acad Sci U S A* 102:485–490.
- Vaudel M, Barsnes H, Berven FS, Sickmann A, Martens L (2011) SearchGUI: An open-source graphical user interface for simultaneous OMSSA and X!Tandem searches. *Proteomics* 11:996–999.
- Vaudel M, Burkhart JM, Zahedi RP, Oveland E, Berven FS, Sickmann A, Martens L, Barsnes H (2015) PeptideShaker enables reanalysis of MS-derived proteomics data sets. *Nat Biotechnol* 33:22–24.
- Vizcaíno JA et al. (2014) ProteomeXchange provides globally coordinated proteomics data submission and dissemination. *Nat Biotechnol* 32:223–226.
- Wake H, Watanabe M, Moorhouse AJ, Kanematsu T, Horibe S, Matsukawa N, Asai K, Ojika K, Hirata M, Nabekura J (2007) Early changes in KCC2 phosphorylation in response to neuronal stress result in functional downregulation. *J Neurosci* 27:1642–1650
- Watanabe M, Wake H, Moorhouse AJ, Nabekura J (2009) Clustering of neuronal K<sup>+</sup>-Cl<sup>-</sup> cotransporters in lipid rafts by tyrosine phosphorylation. *J Biol Chem* 284:27980–27988
- Wenz M, Hartmann AM, Friauf E, Nothwang HG (2009) CIP1 is an activator of the K<sup>+</sup>-Cl<sup>-</sup> cotransporter KCC2. *Biochem Biophys Res Commun* 381:388–392
- Widagdo J, Fang H, Jang SE, Anggono V (2016) PACSIN1 regulates the dynamics of AMPA receptor trafficking. *Sci Rep* 6:31070.
- Williams JR, Sharp JW, Kumari VG, Wilson M, Payne JA (1999) The Neuron-specific K-Cl Cotransporter, KCC2. *J Biol Chem* 274:12656–12664.
- Woo N-S, Lu J, England R, McClellan R, Dufour S, Mount DB, Deutch AY, Lovinger DM, Delpire E (2002) Hyperexcitability and epilepsy associated with disruption of the mouse neuronal-specific K-Cl cotransporter gene. *Hippocampus* 12:258–268

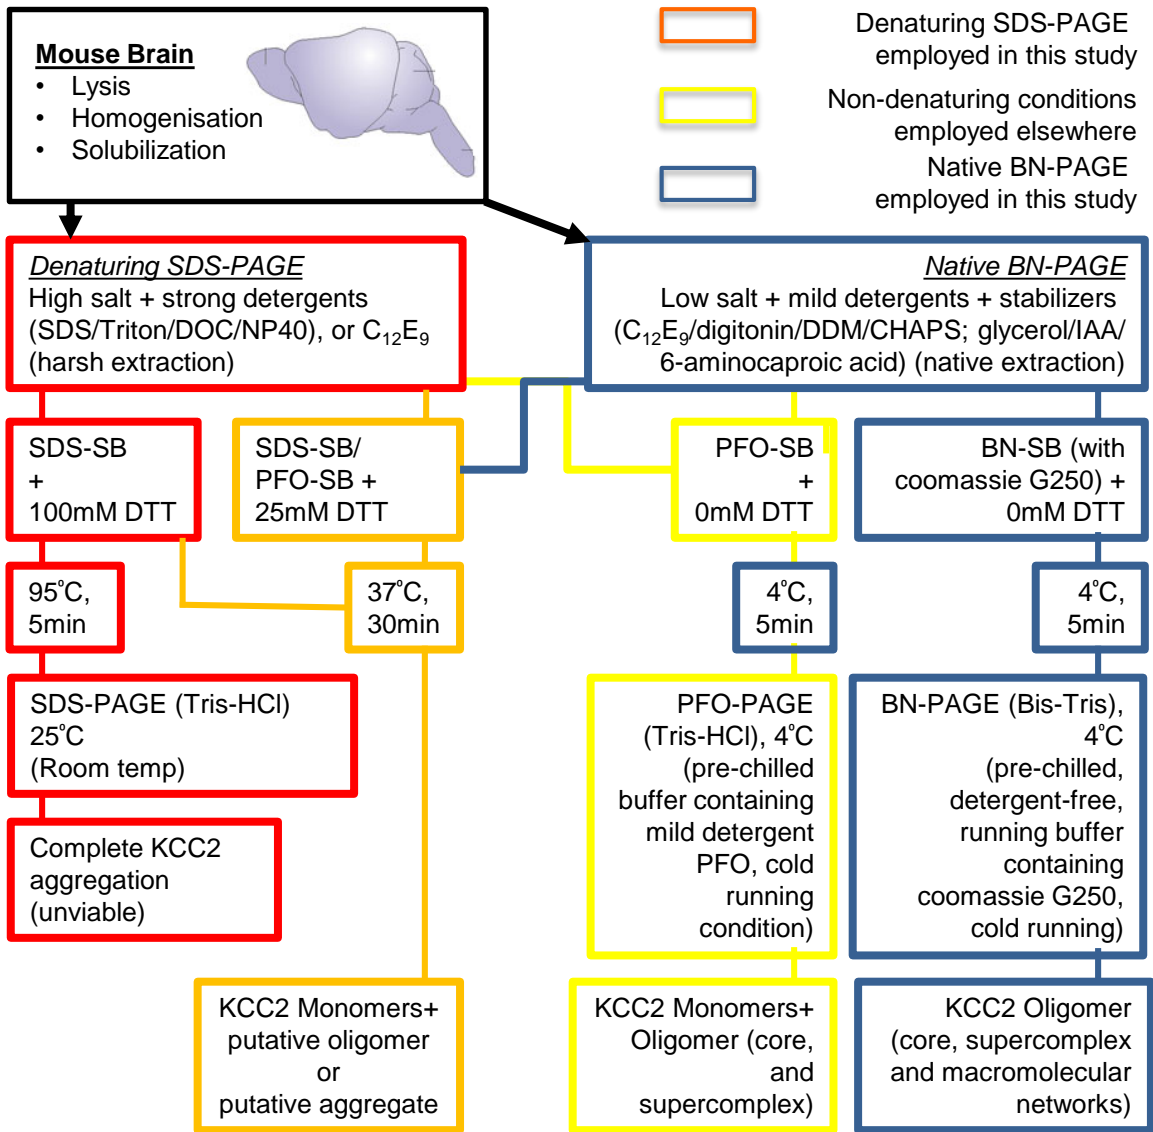

**Figure 1 – Figure Supplemental 1.** Workflow to enrich KCC2 complexes. SDS, sodium dodecyl sulfate; DOC, deoxycholate; NP40, Igepal-CA630; C<sub>12</sub>E<sub>9</sub>, nonaethylene glycol monododecyl ether; DDM, n-dodecyl-β-D-maltoside; PFO, perfluoro-octanoic acid; IAA, Iodoacetamide; BN, blue-native; SB, sample buffer for gel loading. RED/ORANGE lines and boxes indicate harsh KCC2 extraction conditions; YELLOW lines and boxes indicate intermediary KCC2 extraction conditions; BLUE lines and boxes indicate mild, native-KCC2 extraction conditions. The orange and yellow extraction/gel running strategies were employed for studying the stability of KCC2 oligomers (by subjecting them to harsh-to-mildly denaturing conditions). The blue extraction/gel running conditions were employed to study the composition of native-KCC2-oligomers.

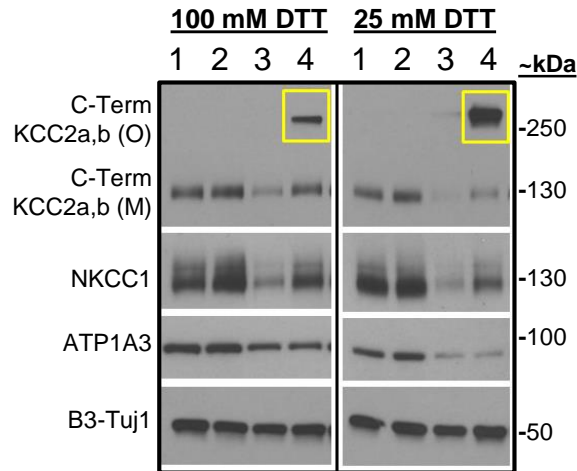

**Figure 1 – Figure Supplemental 2.** SDS-PAGE separation of solubilized membrane fractions. Obtained with high-salt Tris-HCl buffer containing the following detergents (lane 1: 1% Triton, 1% DOC; lane 2: 0.1% SDS, 0.5% DOC, 1% NP40 (RIPA); lane 3: 1% NP40 and lane 4: 1.5% C<sub>12</sub>E<sub>9</sub>). Samples were denatured in SDS-sample buffer containing 100mM DTT or 25mM DTT, @ 37°C for 30 min. Yellow-boxes indicate that C<sub>12</sub>E<sub>9</sub>-based native detergent enriches for more putative-KCC2 oligomers than the previously published KCC2 detergent extractions (lanes 1-3); and that the putative KCC2 oligomers are DTT-sensitive.

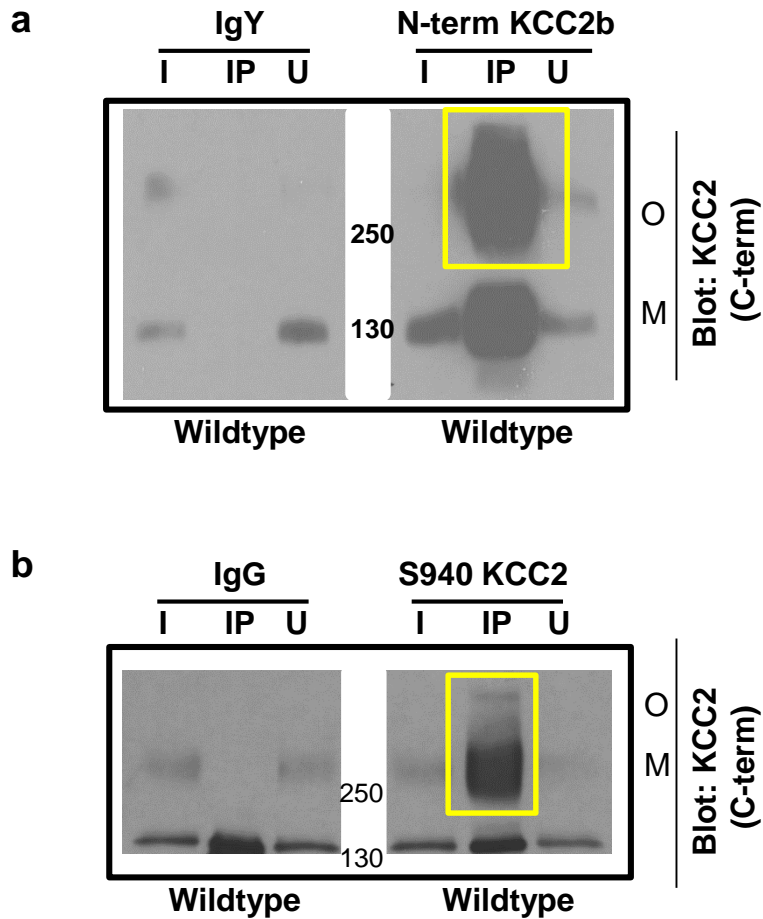

**Figure 2 – Figure Supplemental 1.** Validation of KCC2 antibodies for immunodepletion. Native KCC2 complexes from  $C_{12}E_9$ -solubilized whole-brain membrane fractions immunoprecipitated with pre-immune sera or anti-N-terminal KCC2b antibody (**a**) or anti-p<sup>Ser940</sup> KCC2 antibody (**b**) and immunoblotted with the antibodies indicated at right (C-terminal KCC2 antibody). Representative example of 5 biological replicates. IP, immunoprecipitate; I, input fraction (1% of IP); U, unbound fraction (1% of IP); O, oligomer; M, monomer.

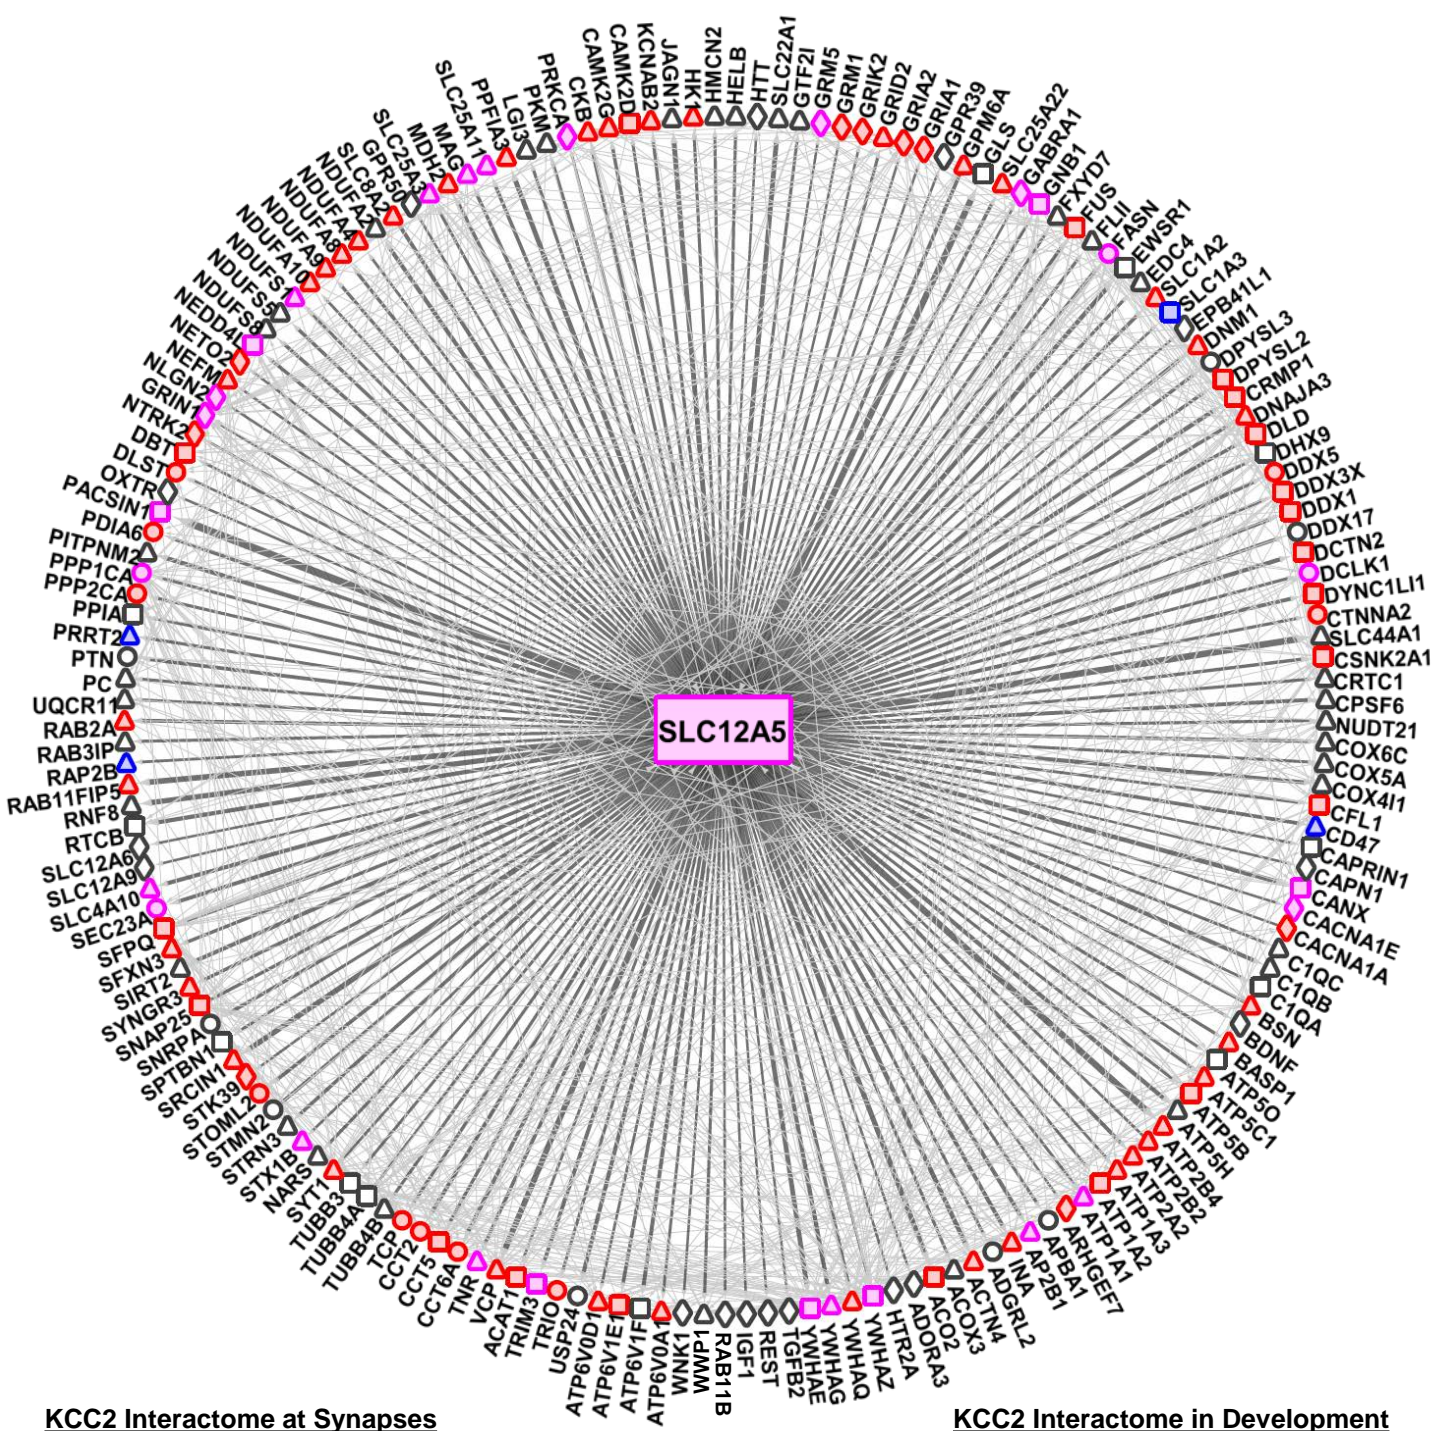

**Figure 3 – Figure Supplement 1.** The SLC12A5/KCC2 interactome. The KCC2 interactome was mapped to the excitatory synapse-enriched PSD proteome, and the inhibitory synapse-enriched GABA<sub>A</sub>R / GABA<sub>B</sub>R / NLGN2 / GlyR proteomes. Circle/triangle/square-shaped nodes represent the KCC2 partners identified in this present study; diamond-shaped nodes represent the KCC2 partners not identified, but previously established as physical/functional partners of KCC2. Red/blue/pink-filled nodes represent synaptic-KCC2 partners; uncoloured nodes represent the putative-, non-synaptic KCC2 partners. The thickness of the edge represents the spectral enrichment (KCC2/IgG). See Supplemental Table 2 for the complete list of all proteins used for mapping.

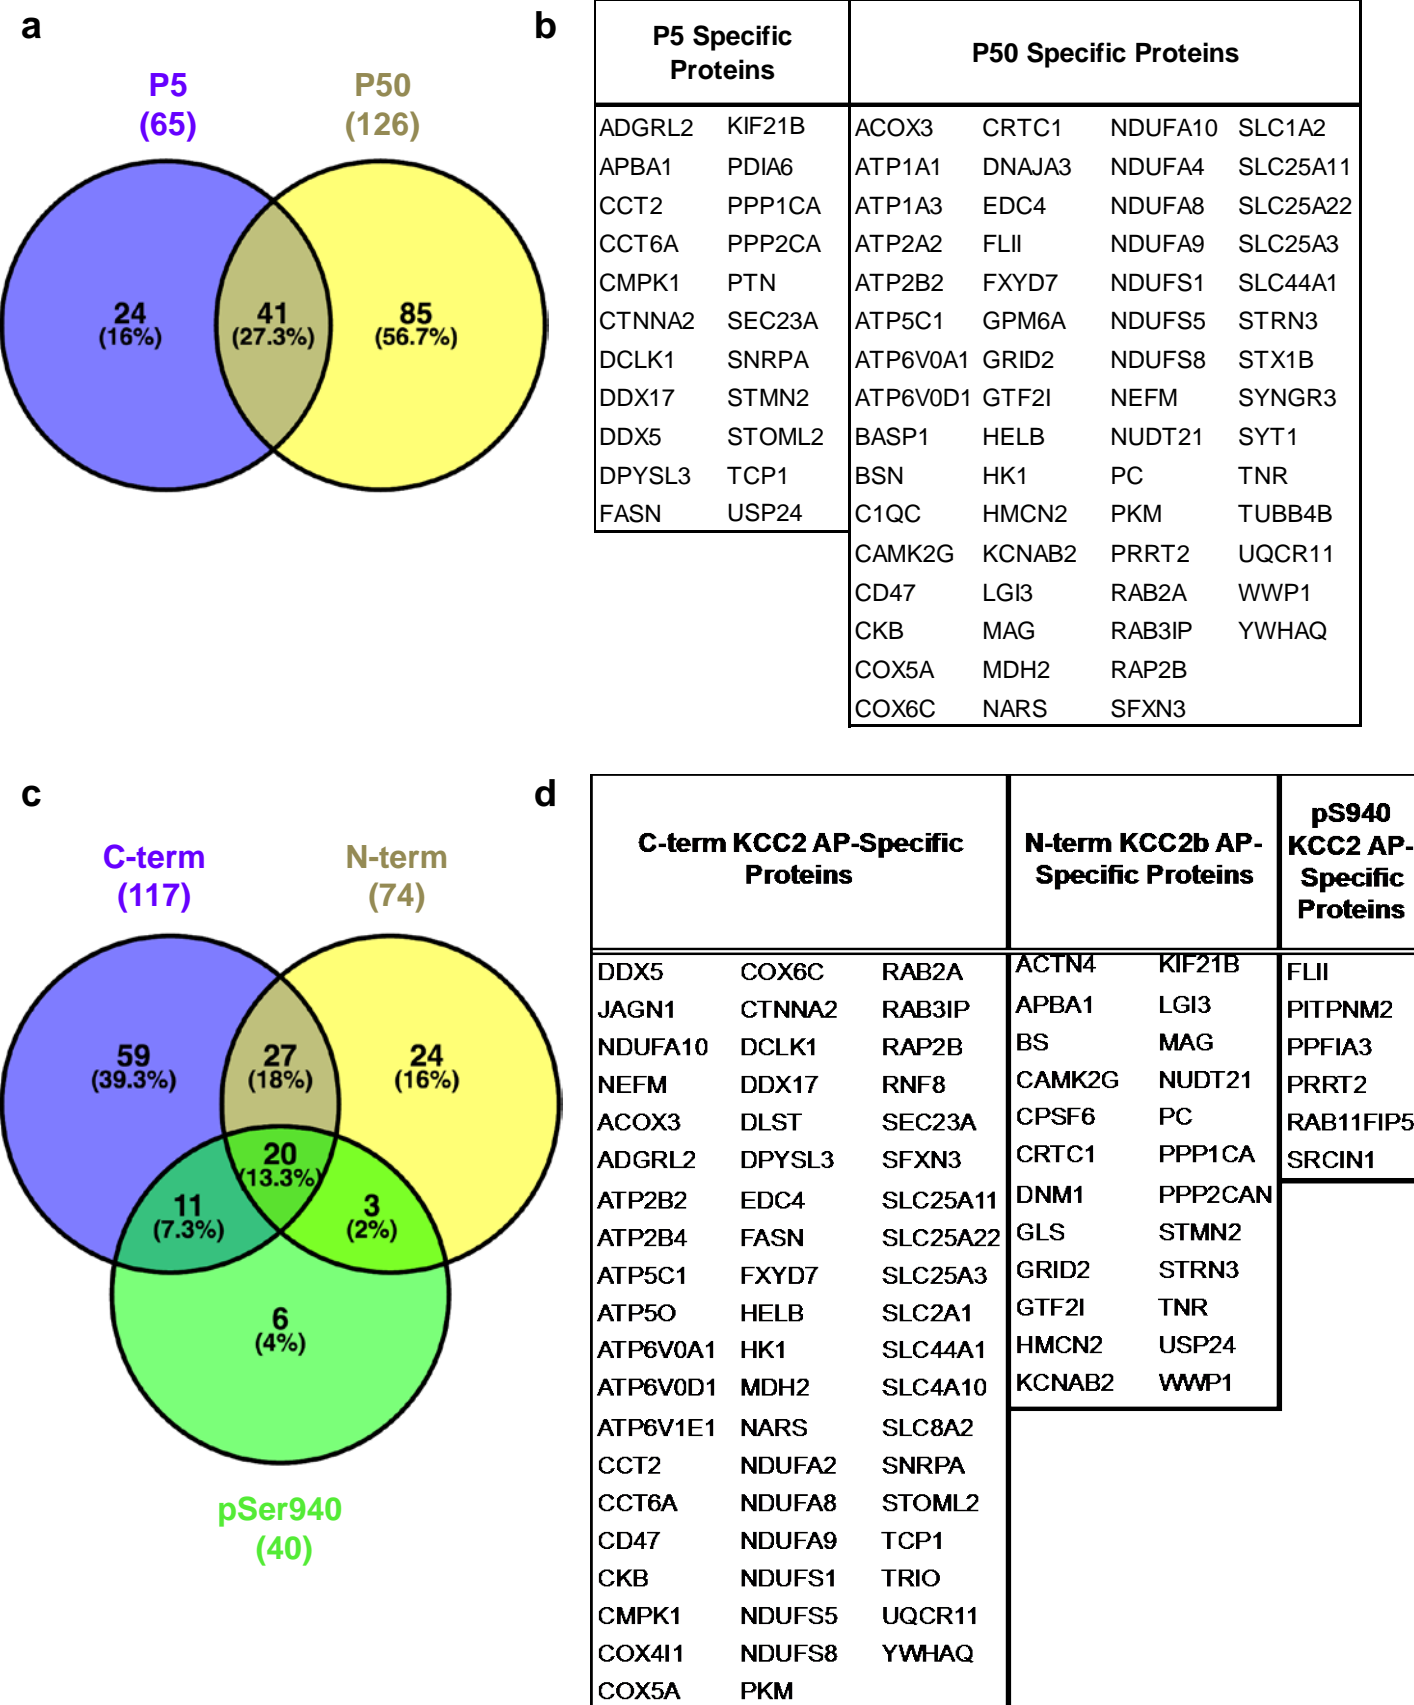

**Figure 3 – Figure Supplement 2.** ME-AP proteomics identify the protein constituents of native KCC2. (a) Venn diagram comparison of the intersection of data obtained using N-term and C-term antibodies in developing and mature brain. (b) Proteins that appear exclusively with P5 or P50 KCC2-immunoprecipitates. (c) Similar to (a) but for data obtained using all three antibodies. (d) Proteins that appear exclusively to the individual KCC2 antibody.



**Figure 3 – Figure Supplement 3** Workflow for curating the KCC2 interactome.

P50, whole brain membrane fractions solubilized with different detergents

Determine that CHAPS, C12E9 detergents (a) extract most KCC2; (b) preserve the native-KCC2 complex stability

Compare the stringency of CHAPS- vs C12E9-solubilised P50 whole brain membrane fractions using C-term anti-KCC2 or control IgG antibodies (See Supplementary table 1)

Determine that C12E9-solubilised fractions were (a) relatively cleaner (more stringent) than CHAPS-based fractions in control IgG-AP (b) and identify known KCC2-partners

ME-AP using C-term, N-term, pS940 KCC2 antibodies in comparison with parallel control IgG/IgY, from C12E9-solubilised membrane fractions from P5 and P50 mouse brains, and run MS assay using Orbitrap Elite instrumentation

RAW spectrum to peptide matches performed using Thermo Scientific TM Proteome Discoverer pipeline and data parsed using Scaffold. Independently, spectrum-peptide matches were performed using mouse database (canonical and isoforms, December 2015) obtained from UNIPROT, and searches performed using freely available proteome analysis software SEARCHGUI, and data parsed using PEPTIDESHAKER <https://compomics.com/>. Results were pooled between the database searches. In total ~14000 proteins were identified, however the spectrum corresponding to only ~450 proteins were identified with 99% confidence and 1% false discovery rate.

Protein candidates from both pilot and primary LC/MS screens were subject to the following stringent criteria to build the KCC2 interactome. Enrichment values for the proteins yielded so far, was calculated as follows:  $\text{Fold enrichment} = [\text{total spectral counts (KCC2-AP)} + 1] / [\text{total spectral counts (IgG-AP)} + 1]$ . The 450 proteins were filtered according to the following criteria: In the first-pass filter grouping, proteins with at least 2 unique peptides and peptide-spectrum matches, 3-fold increase in KCC2 spectral abundance in the KCC2-AP in comparison to IgG-AP were included. This yielded ~ 75 high-confidence, putative-stronger KCC2 partners (Supplemental table 2). In the second pass filter grouping, proteins with only 1 unique peptide, or lesser than 3-fold KCC2-AP enrichment were shifted to the first-pass grouping if, (a) the protein is a validated KCC2 physical/functional interactor in the literature; (b) the protein isoform already appears in the first-pass filter; (c) if the protein appears as a single-peptide interactor across experiments (using multiple antibodies / P50, P5 lysates). This yielded ~186 proteins (See Supplementary table 2).

Next, the proteins that appear in the KCC2 interactome that are previously identified as spurious interactors as identified in the CRAPome database were further eliminated, resulting in 151 proteins that are enriched in the KCC2-AP compared to IgG-AP. These 151 proteins in addition to 31 proteins that are previously established as KCC2-physical/functional partners, but NOT identified in our present LC-MS assay – together comprise the 181 proteins in the KCC2 interactome (See Supplementary Table 2 for complete list of proteins). Lastly the proteins that obtained a normalised spectral count  $\geq 5$  and a MaxP (largest iProb SAINT score)  $\geq 0.89$  were designated as high-confidence (GOLD) KCC2-partners, presented in Figure 3, Supplementary Table 3.

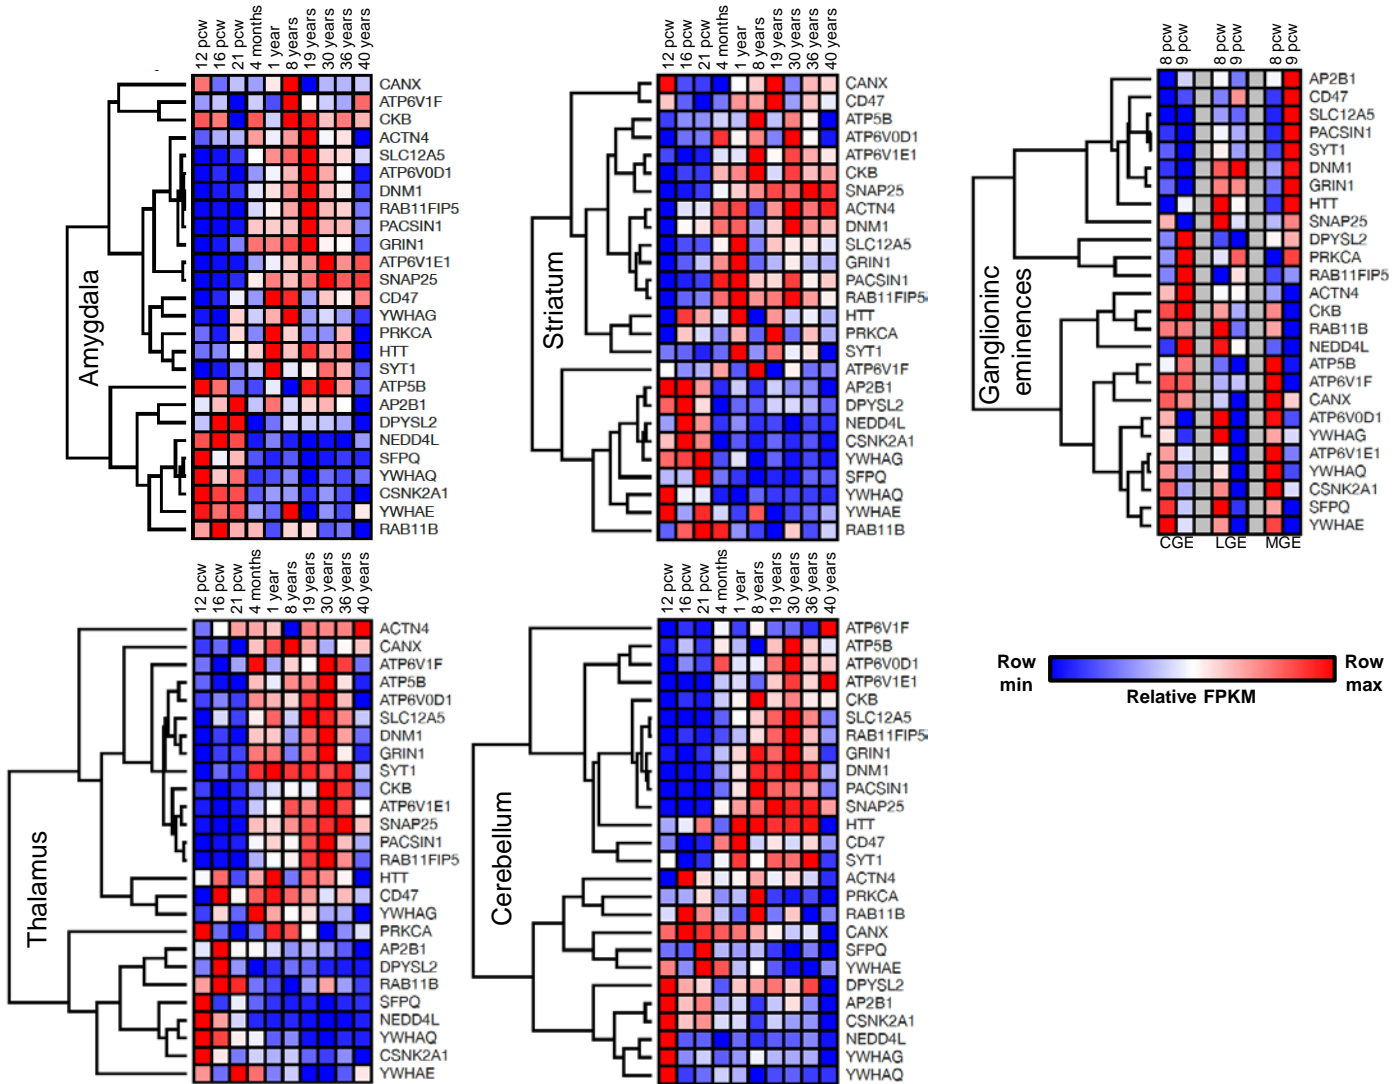

**Figure 5 – Figure Supplement 1.** Spatiotemporal expression patterns of *SLC12A5* and members of receptor trafficking node of the KCC2 interactome in the human brain. The RNAseq data were analyzed for the above members across 5 brain regions including Amygdala, Striatum, Thalamus, Cerebellum and the ganglionic eminences at 8 different developmental periods.

PACSIN1, Mouse  
 Possible Coverage 92.3%,  
 Identified Coverage 73.2%

|      |                         |                         |            |            |                         |
|------|-------------------------|-------------------------|------------|------------|-------------------------|
| 0001 | MSGSYDEASE              | EITDSFWEVG              | NYKRTVKRID | DGHRLCNDLM | SCVQERAKIE              |
| 0051 | KAYAQLTDW               | AKRWRQLIEK              | GPQYGLERA  | WGAMMTEADK | VSELH <sup>Q</sup> EVKN |
| 0101 | SLLNEDLEK               | KNWQDAYHK               | QIMGGFKETK | EAEDGFRKAQ | KPWAKKMKEL              |
| 0151 | EAAKKA <sup>Y</sup> HLA | CKEERLANTR              | EMNSKTBSV  | TPEQQKLLVD | KVDKCRQDVQ              |
| 0201 | KTQEKYEKVL              | EDVGKTPQY               | MEGMEQVFEQ | CQPFEEKRLV | FLKEVLLDIK              |
| 0251 | RHLNLAENSS              | YMHVYRELEQ              | AIRGADAQED | LRWFRSTSGP | GMPMNPQFE               |
| 0301 | EWNPDLPHTT              | AKKEK <sup>Q</sup> PKKA | EGATLSNATG | AVESTSQAGD | RGSVSSYDRG              |
| 0351 | QTYATEWSDD              | ESGNPFGGNE              | ANGGANPFED | DAKGVRVRAL | YDYGQEQDE               |
| 0401 | LSPKAGDEL               | KLGEDEQGW               | CRGLDSGQL  | GLYPANYVEA | I                       |

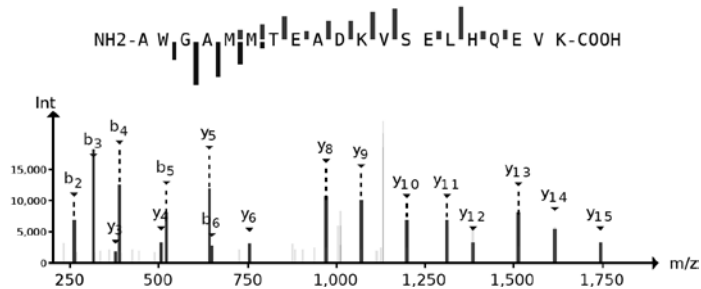

**Figure 5 – Figure Supplement 2.** The primary amino acid sequence coverage of PACSIN1 (left), and protein coverage of PACSIN1 identified by MS analysis are indicated in red. MS/MS- spectra of a peptide unique for PACSIN1, highlighted in yellow. The MS/MS ion fragmentation of the corresponding amino acid sequence is indicated above the spectra (right).
